# Supplementary material for: An Insight into Symmetrical Cyanine Dyes as Promising Selective Antiproliferative Agents in Caco-2 Colorectal Cancer Cells
Source: MDPI journal article supplement (doi:10.3390/molecules27185779), 2022-09-07
Supplement: s1 [file s1]

# Supporting Information

## **An Insight into Symmetrical Cyanine Dyes as Promising Selective Antiproliferative Agents in Caco-2 Colorectal Cancer Cells**

João L. Serrano 1,2,\*,†, Ana Maia 1,2,†, Adriana O. Santos 1, Eurico Lima 1,3, Lucinda V. Reis 3, Maria J. Nunes 2, Renato E. F. Boto 1,2, Samuel Silvestre 1,2,4 and Paulo Almeida 1,2,\*

1 CICS-UBI-Health Sciences Research Center, University of Beira Interior, Av. Infante D. Henrique, 6201-506 Covilhã, Portugal

2 Department of Chemistry, University of Beira Interior, Rua Marquês de Ávila e Bolama, 6201-001 Covilhã, Portugal

3 CQVR-Chemistry Centre of Vila Real, University of Trás-os-Montes and Alto Douro, Quinta de Prados, 5001-801 Vila Real, Portugal

4 CNC-Center for Neuroscience and Cell Biology, University of Coimbra, Rua Larga, 3004-517 Coimbra, Portugal

\* Correspondence: serrano.joao@ubi.pt (J.L.S.); paulo.almeida@ubi.pt (P.A.)

† These authors contributed equally to this work.

## Table of Contents

|                                                                                                                                                                                                                                                                                                                                                                                                              |    |
|--------------------------------------------------------------------------------------------------------------------------------------------------------------------------------------------------------------------------------------------------------------------------------------------------------------------------------------------------------------------------------------------------------------|----|
| <b>Table S1</b> – Characteristic $^1\text{H}$ and $^{13}\text{C}$ NMR spectra signal of dyes <b>2-19</b> .....                                                                                                                                                                                                                                                                                               | 3  |
| <b>Table S2</b> – Data for in vitro effects of bisbenzothiazole <b>1</b> , dyes <b>2-19</b> and 5-fluorouracil (5-FU) on cell viability of human adenocarcinoma cell lines of the prostate (PC-3), breast (MCF-7) and colorectal (Caco-2), and non-tumour cell line of normal human dermal fibroblasts (NHDF), after 72 h of incubation at the single concentration of 10 $\mu\text{M}$ . <sup>a</sup> ..... | 4  |
| <b>Figure S1</b> – Spectral output of the emission spectra from Red (R). Green (G). Blue (B) and White (W) lights of a RGBW LED projector (220-240 V and 30 W. Luxtar). Intensity was normalized and are present as arbitrary units (a.u.). .....                                                                                                                                                            | 5  |
| <b>Figure S2</b> - In vitro photocytotoxic effects of cyanine dye <b>EL4</b> on relative cell viability of non-tumour cell line of normal human dermal fibroblasts (NHDF). Exposure to the dye <b>EL4</b> was evaluated after 72 h of incubation in the dark and after irradiation with a LED system.....                                                                                                    | 5  |
| <b>Figure S3</b> – $^1\text{H}$ and $^{13}\text{C}$ NMR spectra of bisbenzothiazole <b>1</b> .....                                                                                                                                                                                                                                                                                                           | 6  |
| <b>Figure S4</b> – $^1\text{H}$ and $^{13}\text{C}$ NMR spectra of monomethine cyanine dye <b>2</b> . .....                                                                                                                                                                                                                                                                                                  | 7  |
| <b>Figure S5</b> – $^1\text{H}$ and $^{13}\text{C}$ NMR spectra of monomethine cyanine dye <b>3</b> . .....                                                                                                                                                                                                                                                                                                  | 8  |
| <b>Figure S6</b> – $^1\text{H}$ and $^{13}\text{C}$ NMR spectra of monomethine cyanine dye <b>4</b> . .....                                                                                                                                                                                                                                                                                                  | 9  |
| <b>Figure S7</b> – $^1\text{H}$ and $^{13}\text{C}$ NMR spectra of monomethine cyanine dye <b>5</b> . .....                                                                                                                                                                                                                                                                                                  | 10 |
| <b>Figure S8</b> – $^1\text{H}$ and $^{13}\text{C}$ NMR spectra of monomethine cyanine dye <b>6</b> . .....                                                                                                                                                                                                                                                                                                  | 11 |
| <b>Figure S9</b> – $^1\text{H}$ and $^{13}\text{C}$ NMR spectra of monomethine cyanine dye <b>7</b> . .....                                                                                                                                                                                                                                                                                                  | 12 |
| <b>Figure S10</b> – $^1\text{H}$ and $^{13}\text{C}$ NMR spectra of monomethine cyanine dye <b>8</b> . .....                                                                                                                                                                                                                                                                                                 | 13 |
| <b>Figure S11</b> – $^1\text{H}$ and $^{13}\text{C}$ NMR spectra of monomethine cyanine dye <b>9</b> . .....                                                                                                                                                                                                                                                                                                 | 14 |
| <b>Figure S12</b> – $^1\text{H}$ and $^{13}\text{C}$ NMR spectra of monomethine cyanine dye <b>10</b> . .....                                                                                                                                                                                                                                                                                                | 15 |
| <b>Figure S13</b> – $^1\text{H}$ and $^{13}\text{C}$ NMR spectra of monomethine cyanine dye <b>11</b> . .....                                                                                                                                                                                                                                                                                                | 16 |
| <b>Figure S14</b> – $^1\text{H}$ and $^{13}\text{C}$ NMR spectra of monomethine cyanine dye <b>12</b> . .....                                                                                                                                                                                                                                                                                                | 17 |
| <b>Figure S15</b> – $^1\text{H}$ and $^{13}\text{C}$ NMR spectra of monomethine cyanine dye <b>13</b> . .....                                                                                                                                                                                                                                                                                                | 18 |
| <b>Figure S16</b> – $^1\text{H}$ and $^{13}\text{C}$ NMR spectra of monomethine cyanine dye <b>14</b> . .....                                                                                                                                                                                                                                                                                                | 19 |
| <b>Figure S17</b> – $^1\text{H}$ and $^{13}\text{C}$ NMR spectra of trimethine cyanine dye <b>15</b> . .....                                                                                                                                                                                                                                                                                                 | 20 |
| <b>Figure S18</b> – $^1\text{H}$ and $^{13}\text{C}$ NMR spectra of trimethine cyanine dye <b>16</b> . .....                                                                                                                                                                                                                                                                                                 | 21 |
| <b>Figure S19</b> – $^1\text{H}$ and $^{13}\text{C}$ NMR spectra of heptamethine cyanine dye <b>17</b> . .....                                                                                                                                                                                                                                                                                               | 22 |
| <b>Figure S20</b> – $^1\text{H}$ and $^{13}\text{C}$ NMR spectra of heptamethine cyanine dye <b>18</b> . .....                                                                                                                                                                                                                                                                                               | 23 |
| <b>Figure S21</b> – $^1\text{H}$ and $^{13}\text{C}$ NMR spectra of heptamethine cyanine dye <b>19</b> . .....                                                                                                                                                                                                                                                                                               | 24 |
| <b>Figure S22</b> – ESI-HRMS spectrum of monomethine cyanine dye <b>8</b> .....                                                                                                                                                                                                                                                                                                                              | 25 |
| <b>Figure S23</b> – ESI-HRMS spectrum of monomethine cyanine dye <b>9</b> .....                                                                                                                                                                                                                                                                                                                              | 26 |
| <b>Figure S24</b> – ESI-HRMS spectrum of monomethine cyanine dye <b>10</b> .....                                                                                                                                                                                                                                                                                                                             | 27 |
| <b>Figure S25</b> – ESI-HRMS spectrum of monomethine cyanine dye <b>11</b> .....                                                                                                                                                                                                                                                                                                                             | 28 |
| <b>Figure S26</b> – ESI-HRMS spectrum of monomethine cyanine dye <b>14</b> .....                                                                                                                                                                                                                                                                                                                             | 29 |

**Table S1** – Characteristic  $^1\text{H}$  and  $^{13}\text{C}$  NMR spectra signal of dyes **2-19**.

| Dye                | $^1\text{H}$ NMR                                           |                              | $^{13}\text{C}$ NMR  |                |
|--------------------|------------------------------------------------------------|------------------------------|----------------------|----------------|
|                    | $\text{C}=\text{CH}$                                       | $\text{N}^{1/2+}\text{CH}_n$ | $\text{C}=\text{CH}$ | $\text{NCH}_n$ |
| <b>2</b>           | 6.70 (s, 1H)                                               | 4.02 (s, 6H)                 | 83.0                 | 34.2           |
| <b>3</b>           | 6.72 (s, 1H)                                               | 4.03 (s, 6H)                 | 82.9                 | 34.2           |
| <b>4</b>           | 6.70 (s, 1H)                                               | 4.02 (s, 6H)                 | 82.9                 | 34.1           |
| <b>5</b>           | 6.72 (s, 1H)                                               | 4.03 (s, 6H)                 | 82.9                 | 34.1           |
| <b>6</b>           | 6.75 (s, 1H)                                               | 4.70 (q, $J = 7.1$ Hz, 4H)   | 81.9                 | 41.6           |
| <b>7</b>           | 6.75 (s, 1H)                                               | 4.70 (q, $J = 7.2$ Hz, 4H)   | 81.9                 | 41.6           |
| <b>8</b>           | 6.96 (s, 1H)                                               | 5.91 (s, 4H)                 | 83.4                 | 49.1           |
| <b>9</b>           | 6.75 (s, 1H)                                               | 5.71 (s, 4H)                 | 83.4                 | 53.0           |
| <b>10</b>          | 6.68 (s, 1H)                                               | 4.65 (t, $J = 7.5$ Hz, 4H)   | 82.5                 | 46.2           |
| <b>11</b>          | 6.68 (s, 1H)                                               | 4.65 (t, $J = 7.4$ Hz, 4H)   | 82.6                 | 46.2           |
| <b>12</b>          | 5.80 (s, 1H)                                               | 3.83 (s, 6H)                 | 57.5                 | 30.7           |
| <b>13</b>          | 5.83 (s, 1H)                                               | 4.00 (s, 6H)                 | 92.7                 | 38.2           |
| <b>14</b>          | 7.24 (s, 1H)                                               | 4.45 (t, $J = 7.3$ Hz, 4H)   | 96.5                 | 54.8           |
| <b>15</b>          | 8.32 (t, $J = 13.3$ Hz, 1H)                                | 4.26 (q, $J = 7.2$ Hz, 4H)   | 146.5                | 39.0           |
|                    | 6.09 (d, $J = 13.3$ Hz, 2H)                                |                              | 84.9                 |                |
| <b>16</b>          | 7.81 (t, $J = 12.4$ Hz, 1H)                                | 4.38 (q, $J = 7.1$ Hz, 4H)   | 151.7                | 42.3           |
|                    | 6.79 (d, $J = 12.4$ Hz, 2H)                                |                              | 103.2                |                |
| <b>17</b>          | 7.78 (d, $J = 13.4$ Hz, 2H)<br>6.45 (d, $J = 13.5$ Hz, 2H) | 4.39 (t, $J = 6.8$ Hz, 4H)   | 144.2 (C)            | 46.1           |
|                    |                                                            |                              | 141.6 (CH)           |                |
|                    |                                                            |                              | 125.2 (C)            |                |
| <b>18</b>          | 7.70 (d, $J = 10.2$ Hz, 4H)<br>6.60 (d, $J = 13.2$ Hz, 2H) | 4.42 (t, $J = 6.9$ Hz, 4H)   | 100.0 (CH)           | 46.9           |
|                    |                                                            |                              | 144.1 (C)            |                |
|                    |                                                            |                              | 143.1 (CH)           |                |
| <b>19</b> (IR-783) | 8.26 (d, $J = 14.1$ Hz, 2H)<br>6.37 (d, $J = 14.1$ Hz, 2H) | 4.22 (t, $J = 7.4$ Hz, 4H)   | 125.2 (C)            | 50.7           |
|                    |                                                            |                              | 103.8 (CH)           |                |
|                    |                                                            |                              | 143.1 (C)            |                |
|                    |                                                            |                              | 142.1 (CH)           |                |
|                    |                                                            |                              | 125.1 (C)            |                |
|                    |                                                            |                              | 101.8 (CH)           |                |

**Table S2** – Data for *in vitro* effects of bisbenzothiazole **1**, dyes **2-19** and 5-fluorouracil (5-FU) on cell viability of human adenocarcinoma cell lines of the prostate (PC-3), breast (MCF-7) and colorectal (Caco-2), and non-tumour cell line of normal human dermal fibroblasts (NHDF), after 72 h of incubation at the single concentration of 10  $\mu$ M.<sup>a</sup>

|           | PC-3              | MCF-7             | Caco-2           | NHDF             |
|-----------|-------------------|-------------------|------------------|------------------|
| Control   | 100 $\pm$ 5.19    | 100 $\pm$ 13.14   | 100 $\pm$ 6.69   | 100 $\pm$ 5.45   |
| 5-FU      | 11.89 $\pm$ 2.1   | 15.99 $\pm$ 1.8   | 25.67 $\pm$ 1.02 | 12.67 $\pm$ 3.99 |
| <b>1</b>  | 53.21 $\pm$ 9.68  | 55.73 $\pm$ 4.97  | 59.56 $\pm$ 5.45 | 31.02 $\pm$ 0.57 |
| <b>2</b>  | 1.29 $\pm$ 0.24   | 0.85 $\pm$ 0.34   | 2.18 $\pm$ 0.64  | 5.64 $\pm$ 1.15  |
| <b>3</b>  | 1.27 $\pm$ 0.31   | 0.52 $\pm$ 0.39   | 1.68 $\pm$ 0.53  | 3.93 $\pm$ 0.75  |
| <b>4</b>  | 1.18 $\pm$ 0.36   | 2.26 $\pm$ 0.82   | 3.01 $\pm$ 0.74  | 3.82 $\pm$ 0.21  |
| <b>5</b>  | 1 $\pm$ 0.18      | 1.55 $\pm$ 0.53   | 2.55 $\pm$ 0.58  | 4.42 $\pm$ 0.55  |
| <b>6</b>  | 2.06 $\pm$ 0.89   | 1.08 $\pm$ 0.23   | 3.52 $\pm$ 0.3   | 3.37 $\pm$ 0.65  |
| <b>7</b>  | 1.19 $\pm$ 0.29   | 0.96 $\pm$ 0.61   | 3.11 $\pm$ 0.94  | 3.34 $\pm$ 0.14  |
| <b>8</b>  | 1.16 $\pm$ 0.49   | 1.47 $\pm$ 1.13   | 0.32 $\pm$ 0.03  | 2.04 $\pm$ 0.39  |
| <b>9</b>  | 46.75 $\pm$ 14.01 | 48.97 $\pm$ 13.91 | 46.96 $\pm$ 6.81 | 47.91 $\pm$ 3.64 |
| <b>10</b> | 0.97 $\pm$ 0.26   | 0.87 $\pm$ 2.53   | 1.02 $\pm$ 0.42  | 0.1 $\pm$ 0.36   |
| <b>11</b> | 0.94 $\pm$ 0.11   | 0.1 $\pm$ 0.69    | 0.66 $\pm$ 0.44  | 0.15 $\pm$ 0.38  |
| <b>12</b> | 9.33 $\pm$ 4.28   | 10.8 $\pm$ 1.98   | 10.01 $\pm$ 0.93 | 41.01 $\pm$ 0.82 |
| <b>13</b> | 7.42 $\pm$ 1.27   | 11.78 $\pm$ 1.89  | 7.81 $\pm$ 0.51  | 8.37 $\pm$ 2.26  |
| <b>14</b> | 8.03 $\pm$ 2.15   | 22.94 $\pm$ 0.68  | 9.84 $\pm$ 0.93  | 1.99 $\pm$ 0.25  |
| <b>15</b> | 13.31 $\pm$ 1.9   | 6.03 $\pm$ 0.77   | 8.58 $\pm$ 0.92  | 3.72 $\pm$ 0.23  |
| <b>16</b> | 3.92 $\pm$ 0.75   | 1.39 $\pm$ 0.68   | 1.25 $\pm$ 0.39  | 4.53 $\pm$ 0.39  |
| <b>17</b> | 0.43 $\pm$ 0.26   | 11.18 $\pm$ 3.11  | 0.24 $\pm$ 0.17  | 2.26 $\pm$ 0.1   |
| <b>18</b> | 28.43 $\pm$ 7.73  | 51.76 $\pm$ 10.12 | 47.24 $\pm$ 5.29 | 36.59 $\pm$ 1.75 |
| <b>19</b> | 51.07 $\pm$ 5.32  | 94.41 $\pm$ 7.99  | 57.35 $\pm$ 1.75 | 42.01 $\pm$ 1.76 |

<sup>a</sup> Results are expressed as average values of cell viability percentage in relation with control  $\pm$  standard deviation of two independent assays performed in quadruplicate. A  $p < 0.001$  versus negative control in the statistical significance analysis (Student's t-test) was observed for all compounds, except for dye **19** in the MCF-7 cell line (absence of any statistical difference).

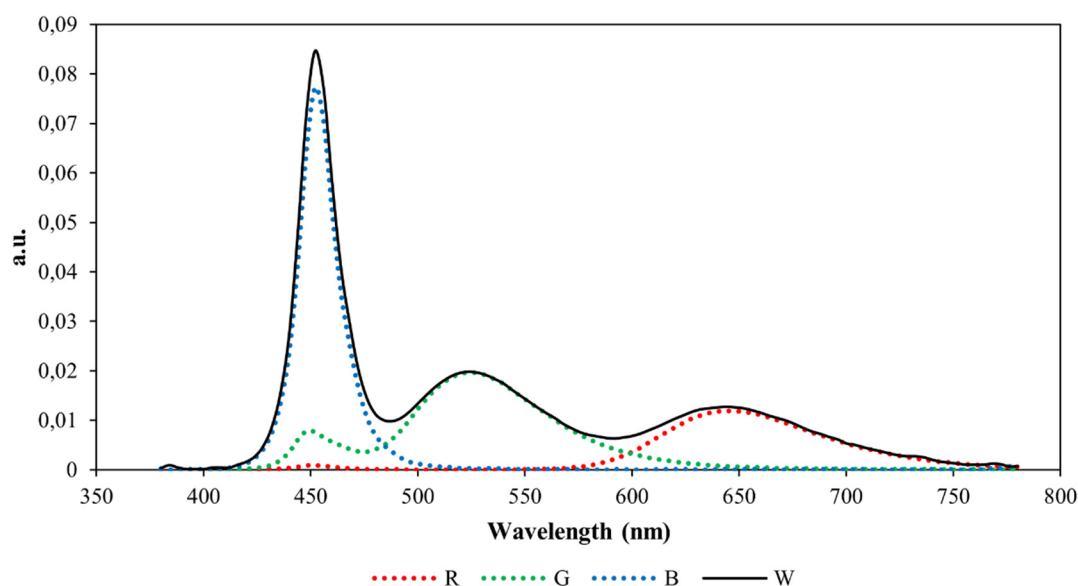

**Figure S1** – Spectral output of the emission spectra from Red (R). Green (G). Blue (B) and White (W) lights of a RGBW LED projector (220-240 V and 30 W. Luxtar). Intensity was normalized and are present as arbitrary units (a.u.).

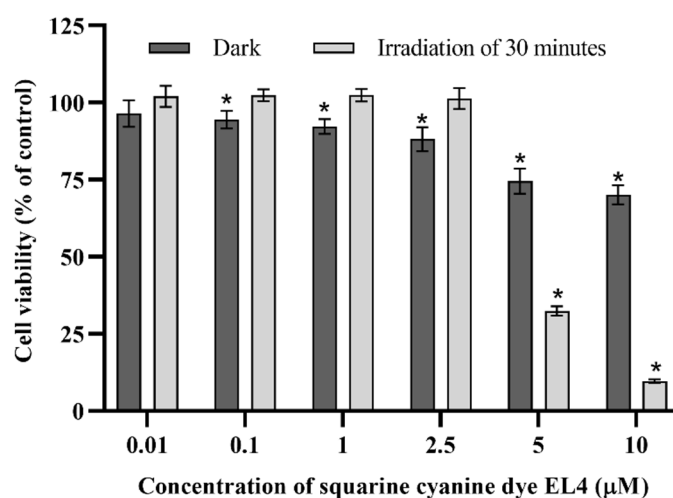

**Figure S2** - *In vitro* photocytotoxic effects of cyanine dye **EL4** on relative cell viability of non-tumour cell line of normal human dermal fibroblasts (NHDF). Exposure to the dye **EL4** was evaluated after 72 h of incubation in the dark and after irradiation with a LED system. For this assay, NHDF cells were incubated 48 h with the dye **EL4** at different concentrations and then exposed to white light from a 30 W RGB LED system for 30 minutes. Cell viability was evaluated 24 h after irradiation by the MTT assay. Results are expressed as average values  $\pm$  standard deviation of two independent assays performed in quadrupled. A  $p < 0.05$  versus negative control in the statistical significance analysis (Student's t-test) was observed for the treatments evidenced by a signal (\*).

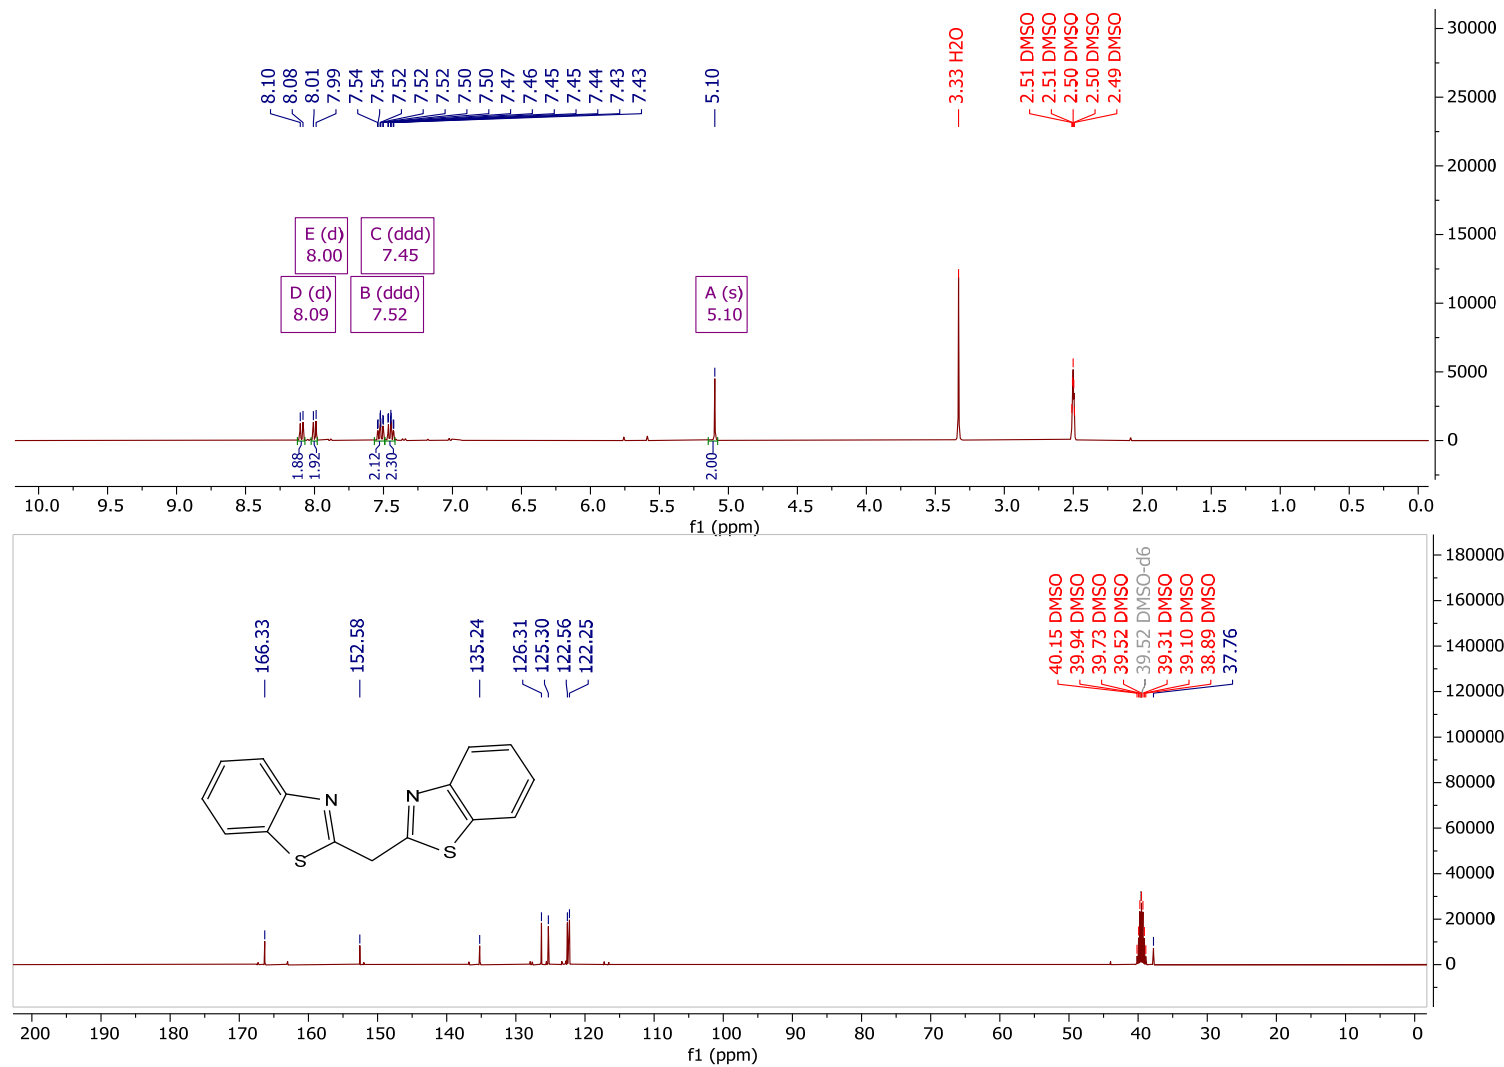

**Figure S3** – <sup>1</sup>H and <sup>13</sup>C NMR spectra of bisbenzothiazole **1**.

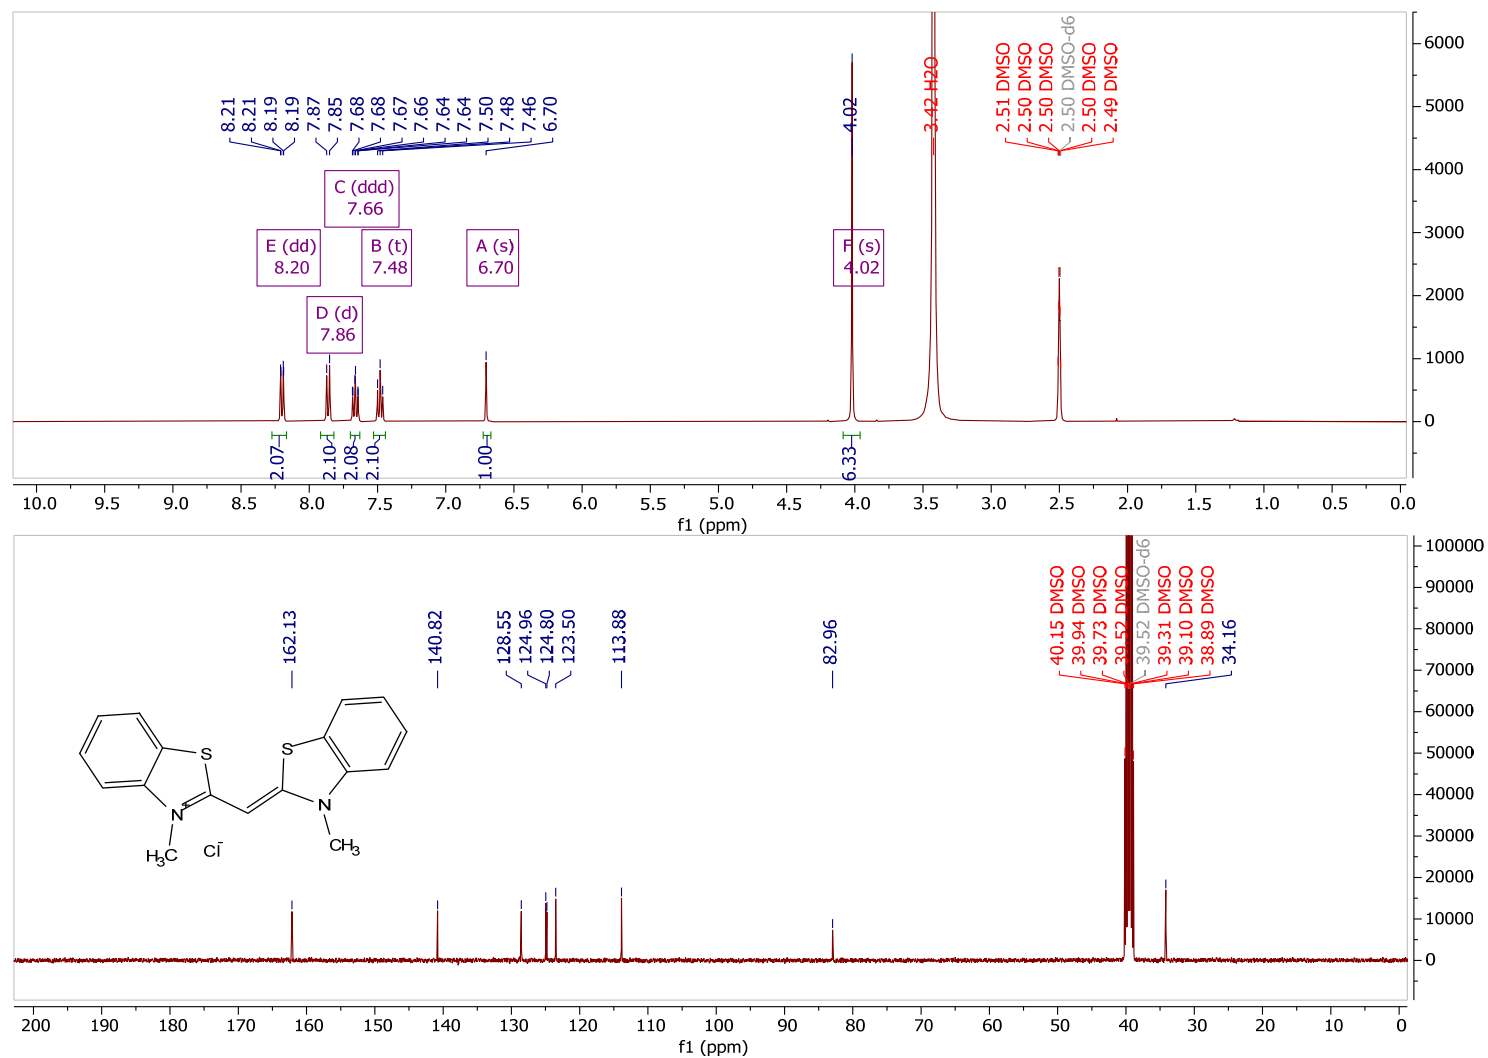

**Figure S4** – <sup>1</sup>H and <sup>13</sup>C NMR spectra of monomethine cyanine dye **2**.

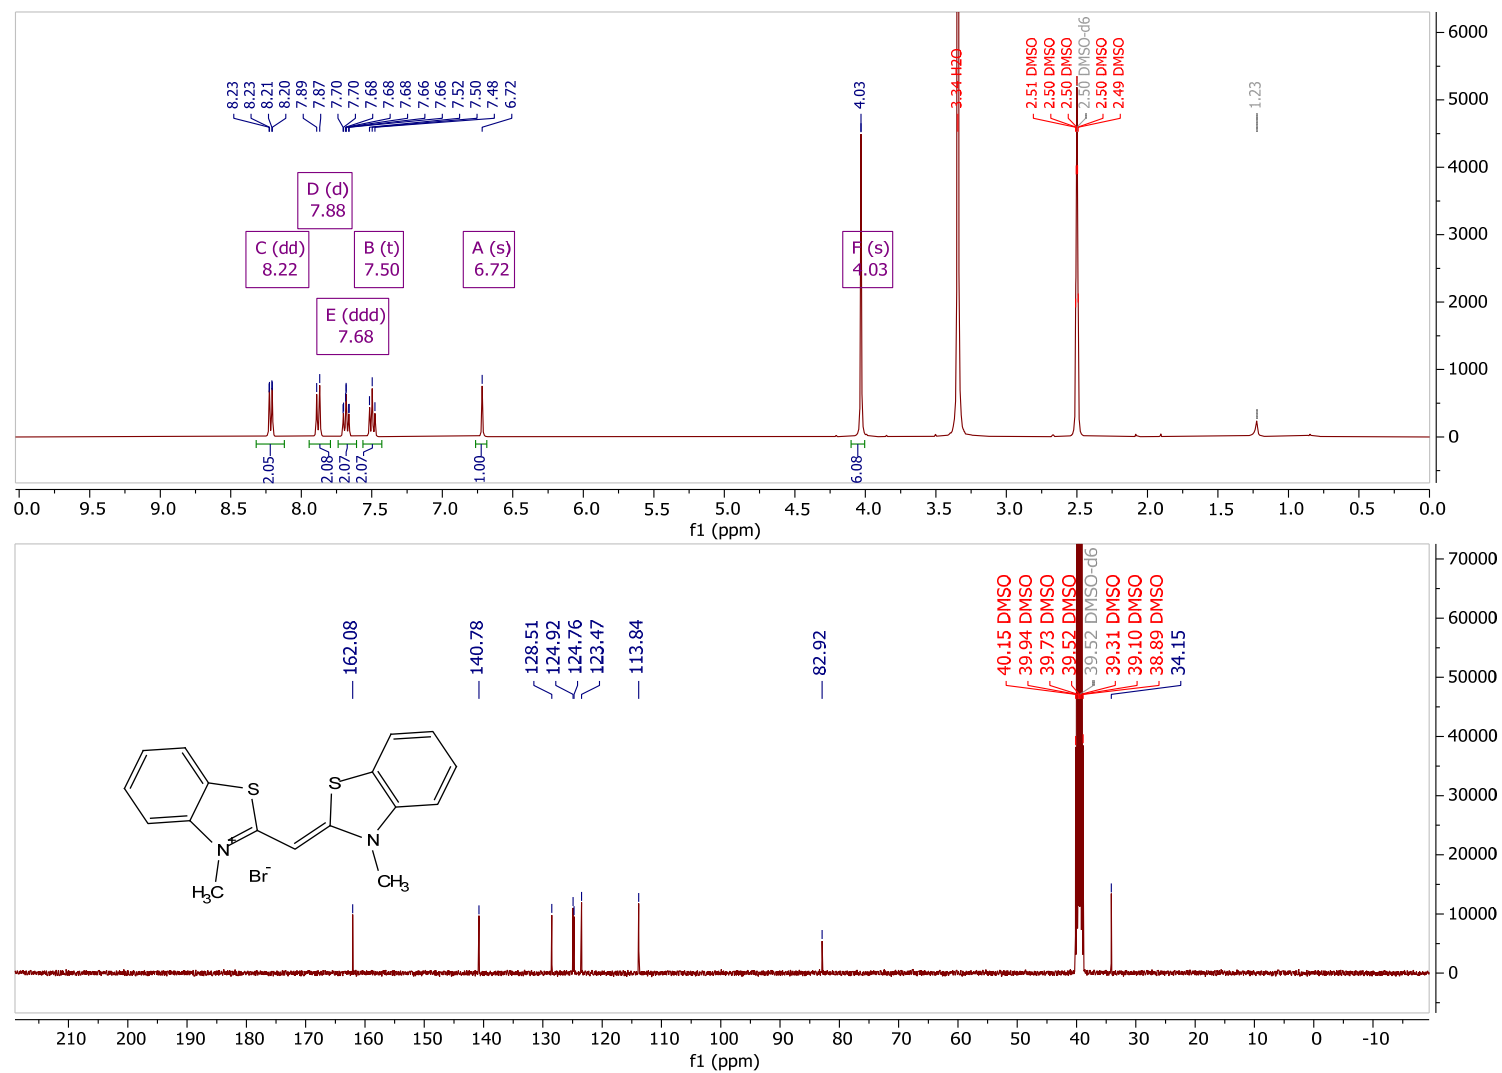

**Figure S5** – <sup>1</sup>H and <sup>13</sup>C NMR spectra of monomethine cyanine dye **3**.



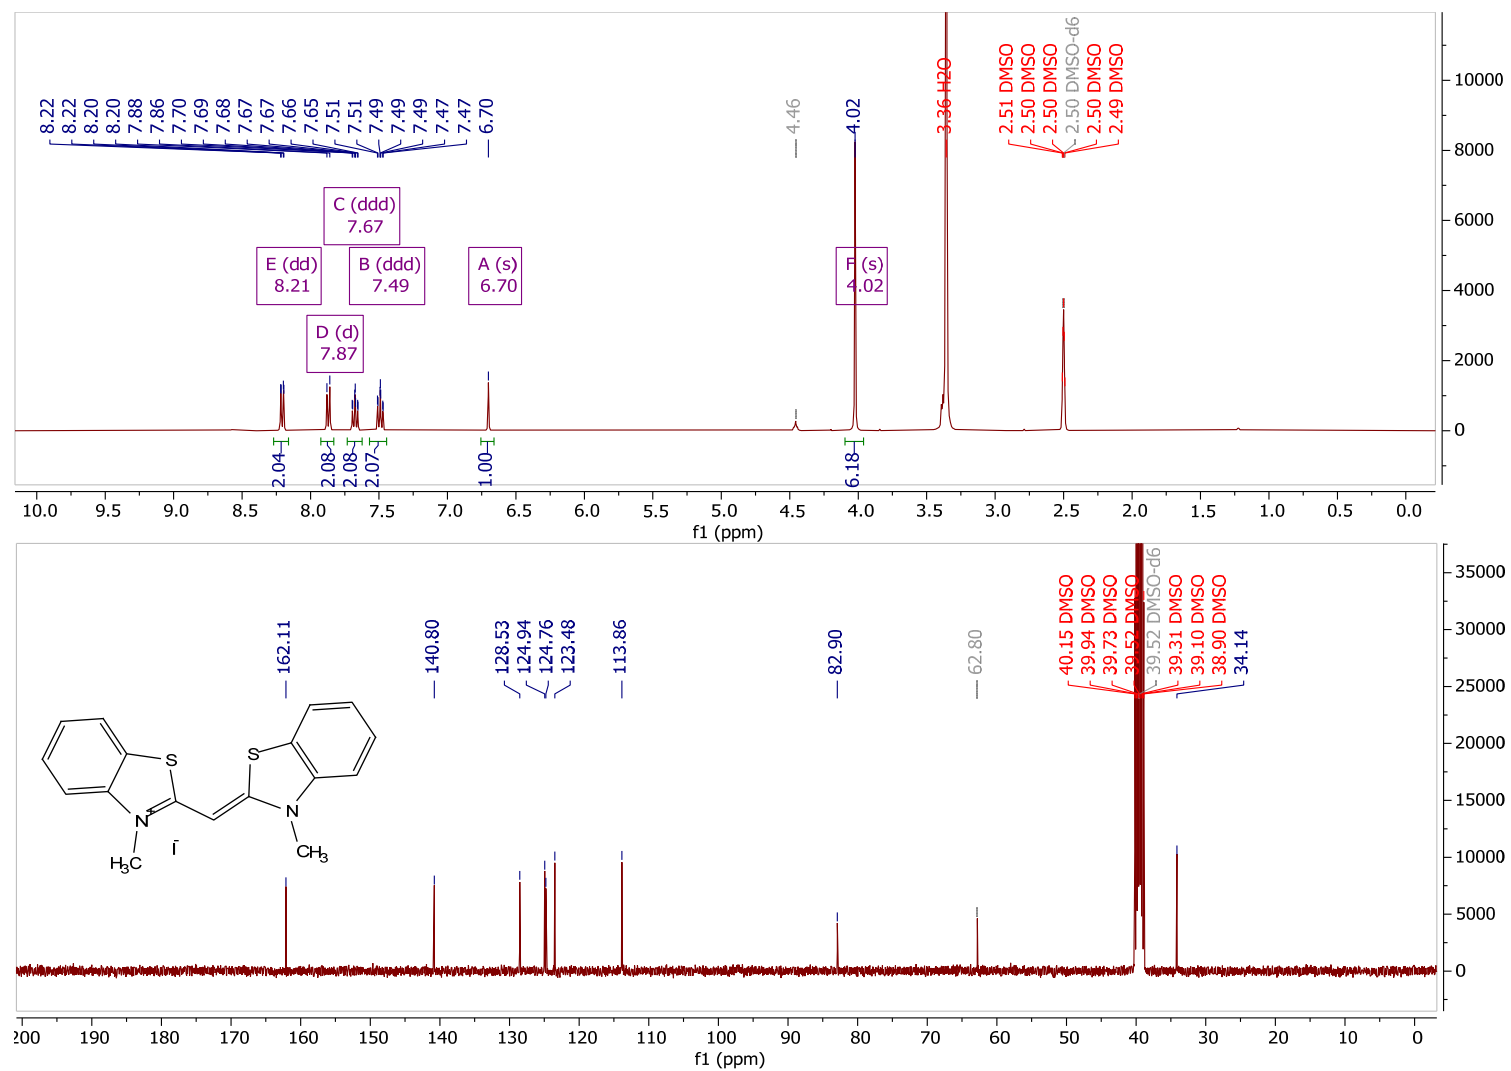

**Figure S6** –  $^1\text{H}$  and  $^{13}\text{C}$  NMR spectra of monomethine cyanine dye **4**.

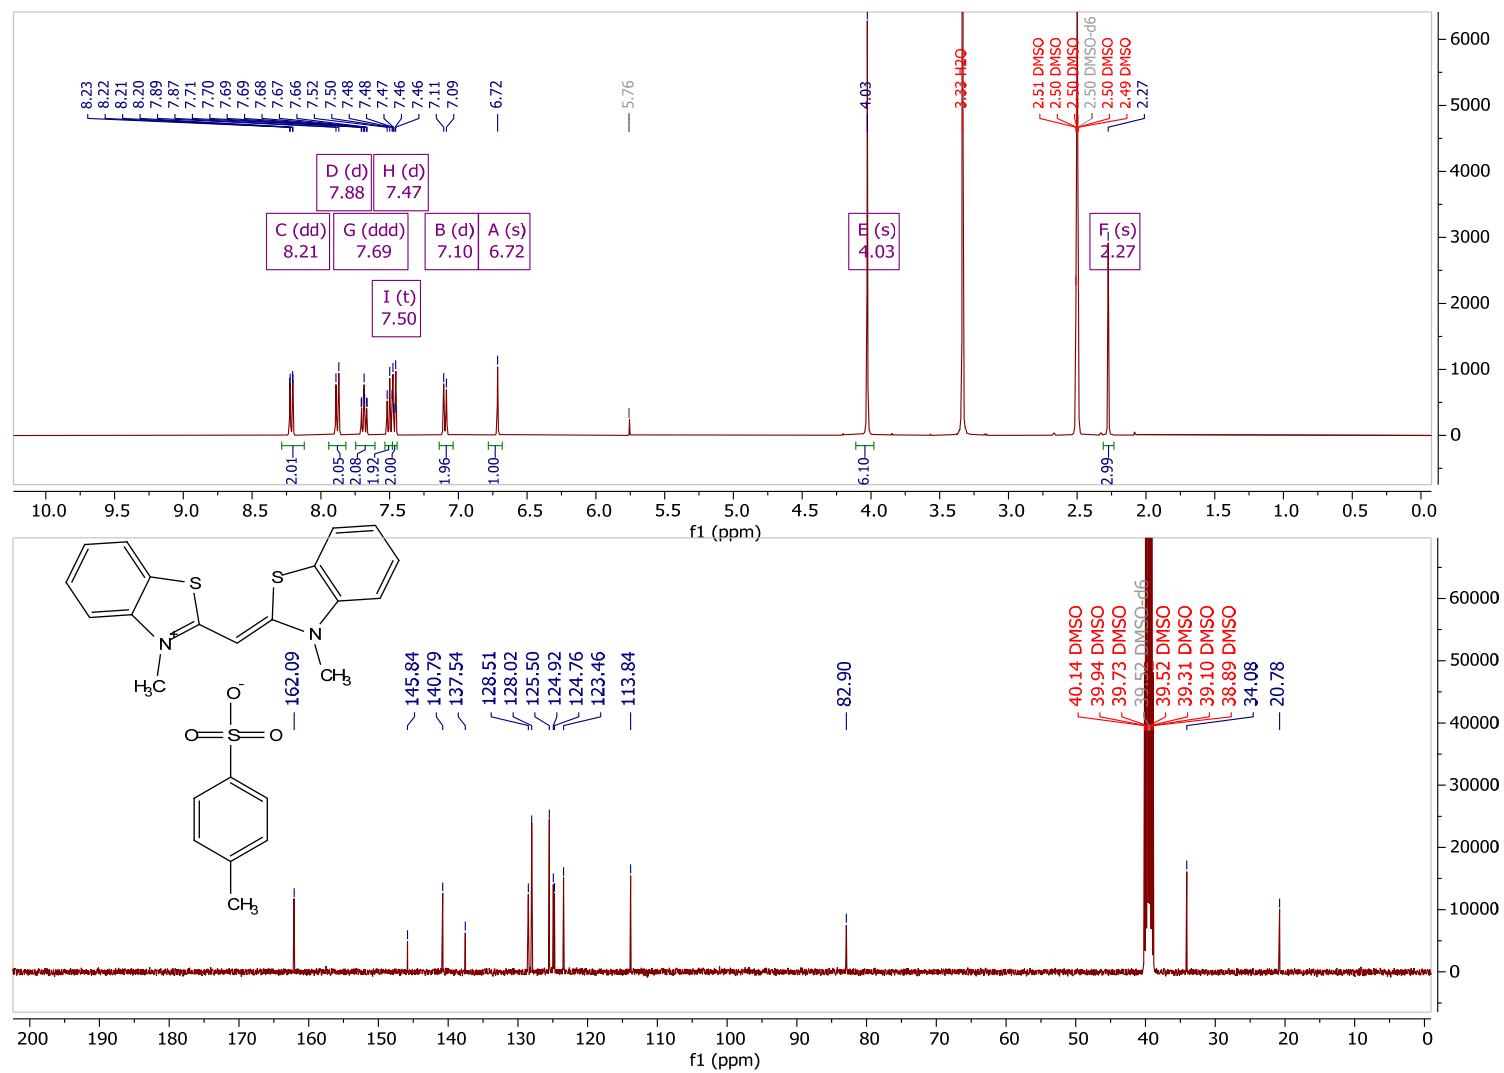

**Figure S7** – <sup>1</sup>H and <sup>13</sup>C NMR spectra of monomethine cyanine dye **5**.

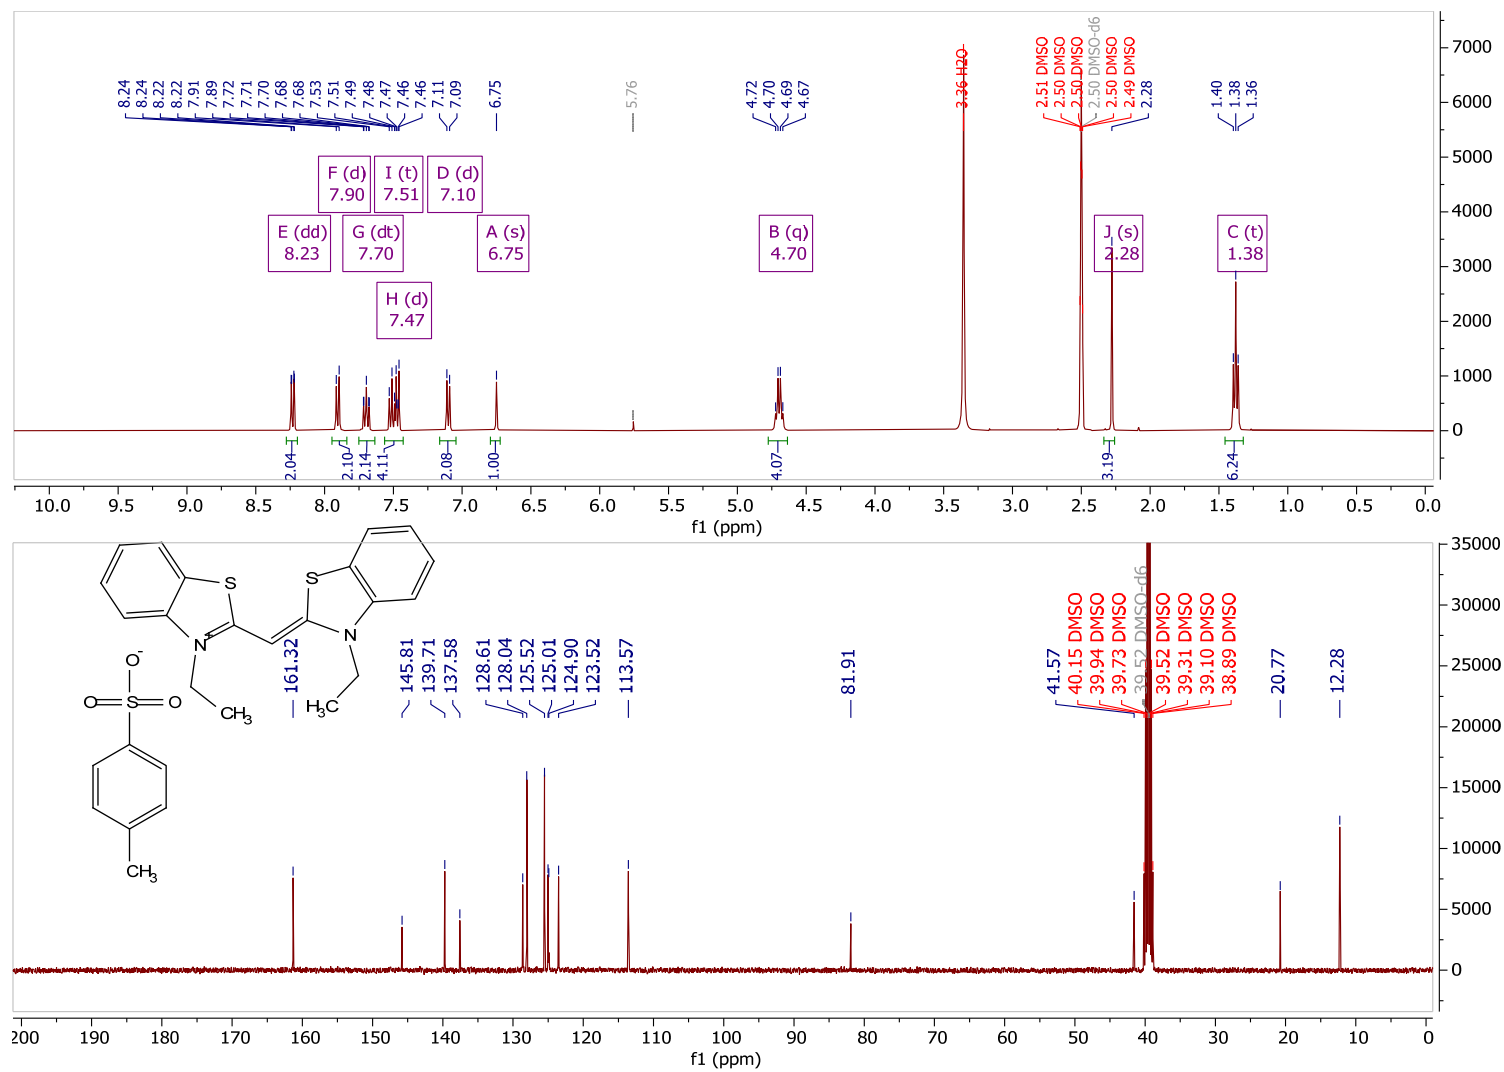

**Figure S8** – <sup>1</sup>H and <sup>13</sup>C NMR spectra of monomethine cyanine dye **6**.

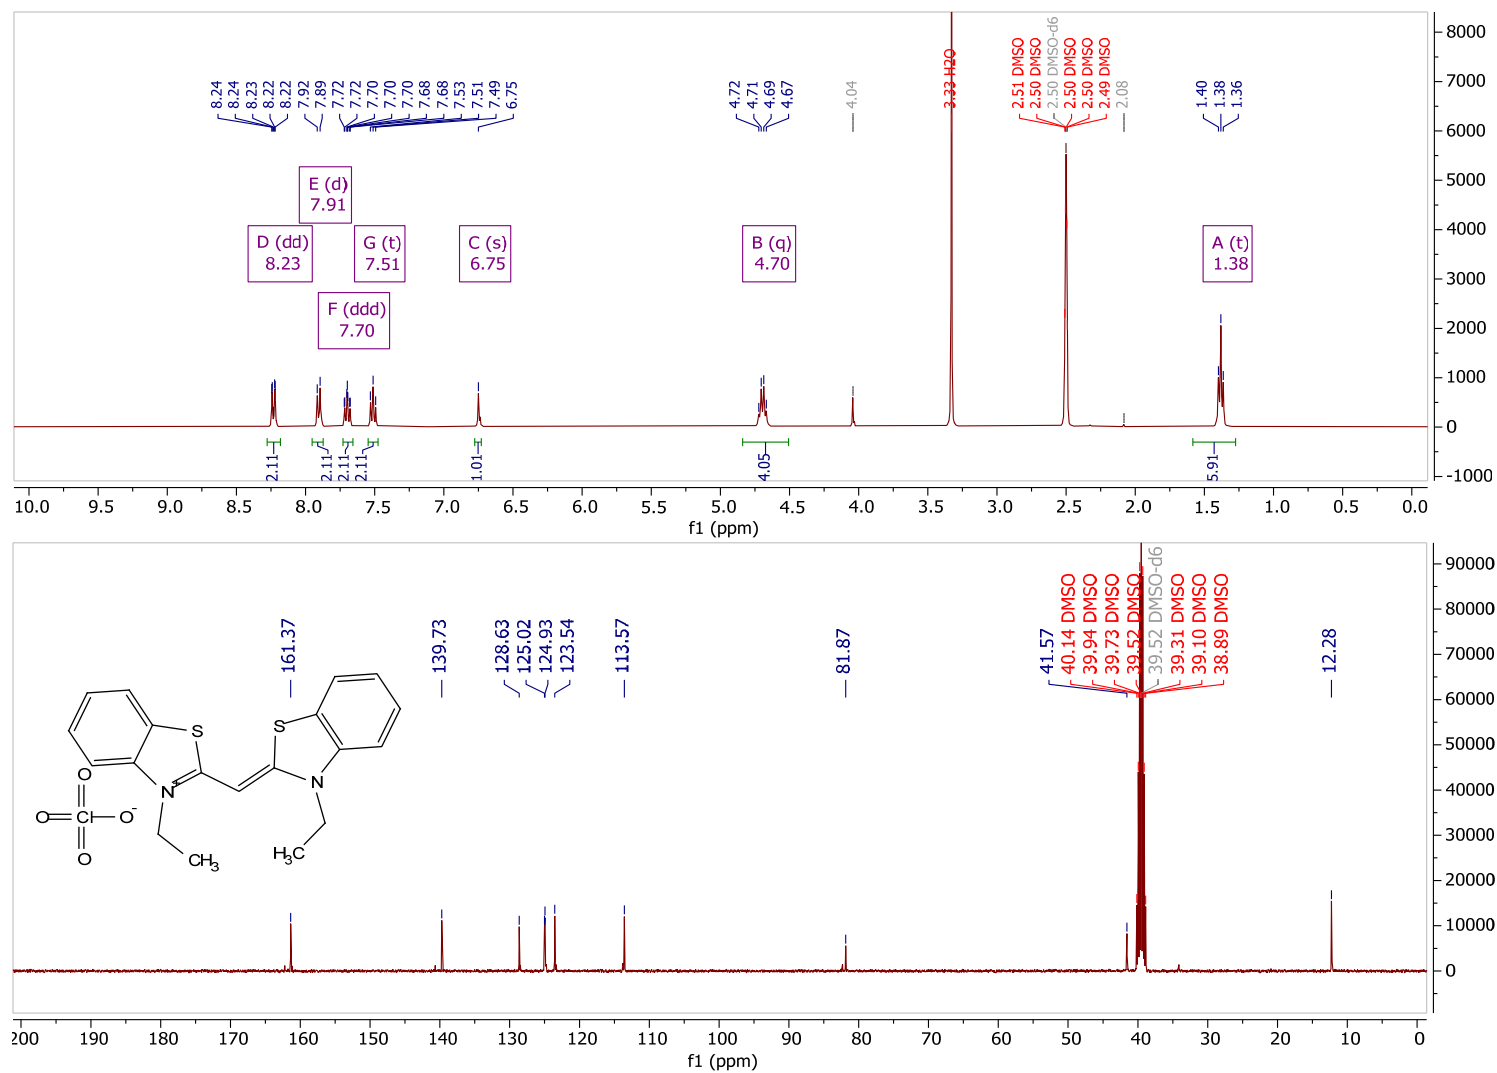

**Figure S9** – <sup>1</sup>H and <sup>13</sup>C NMR spectra of monomethine cyanine dye **7**.

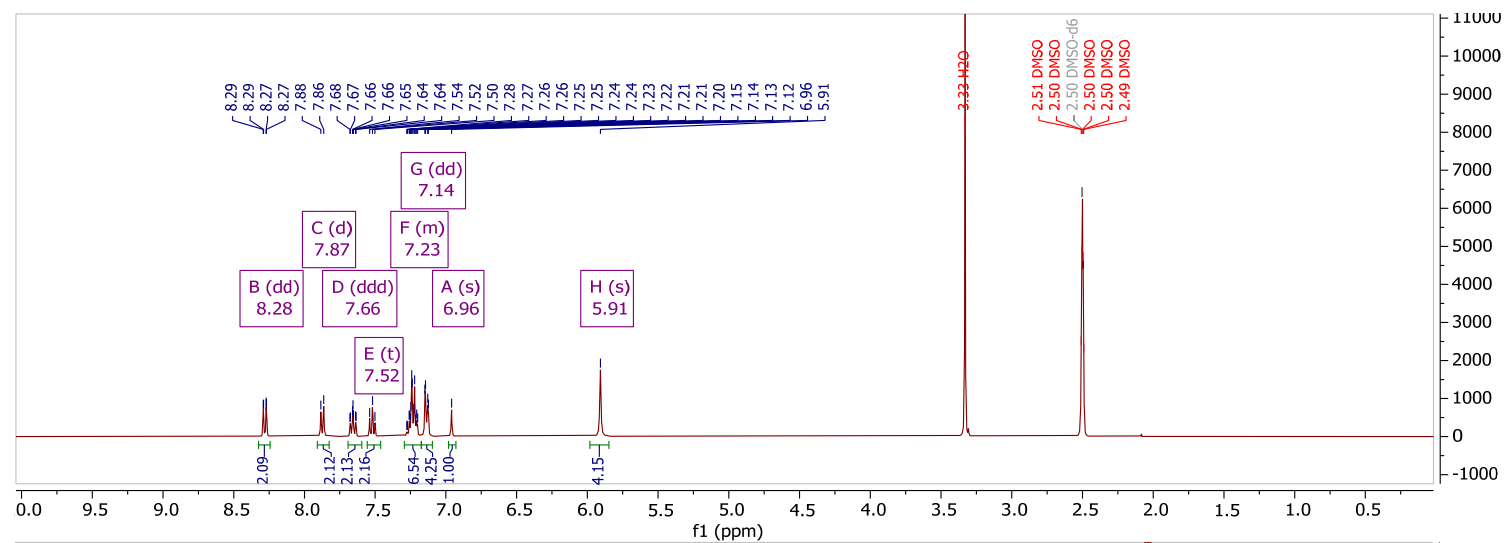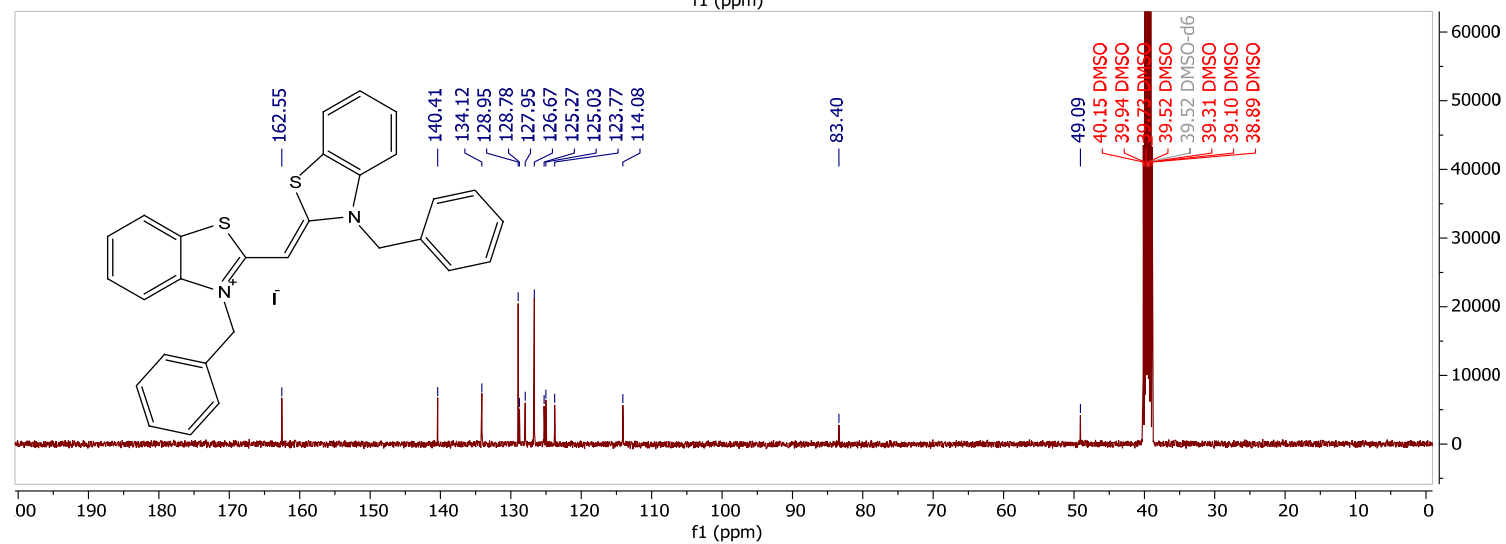

**Figure S10** – <sup>1</sup>H and <sup>13</sup>C NMR spectra of monomethine cyanine dye **8**.

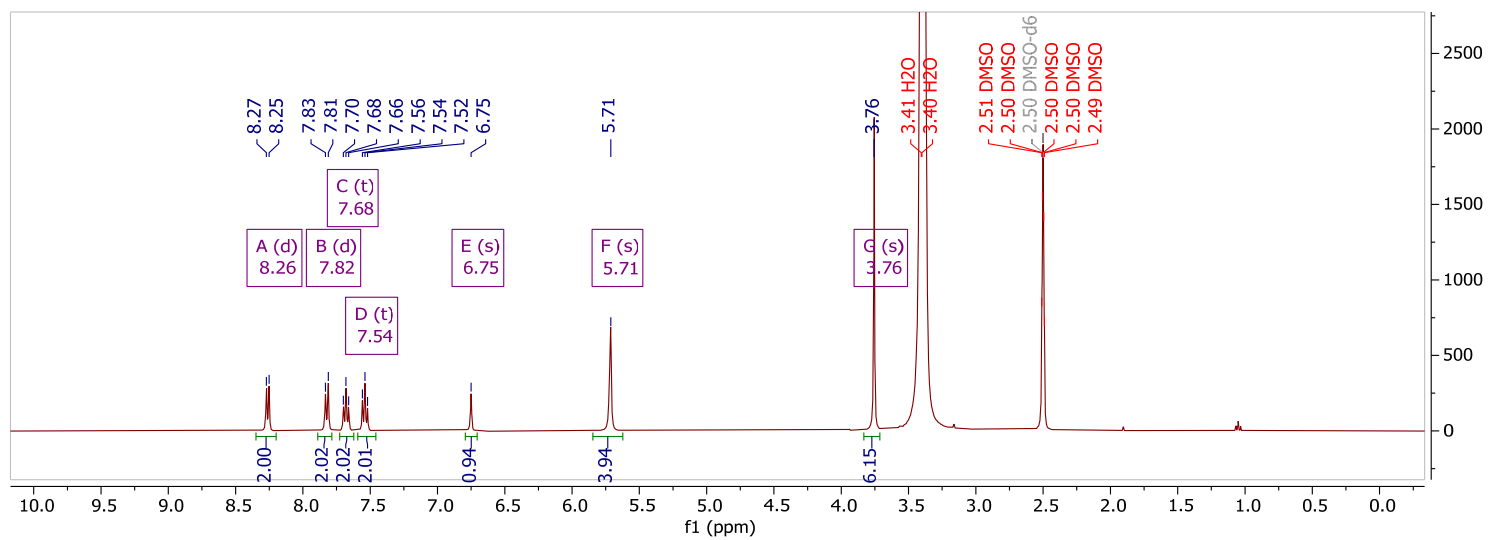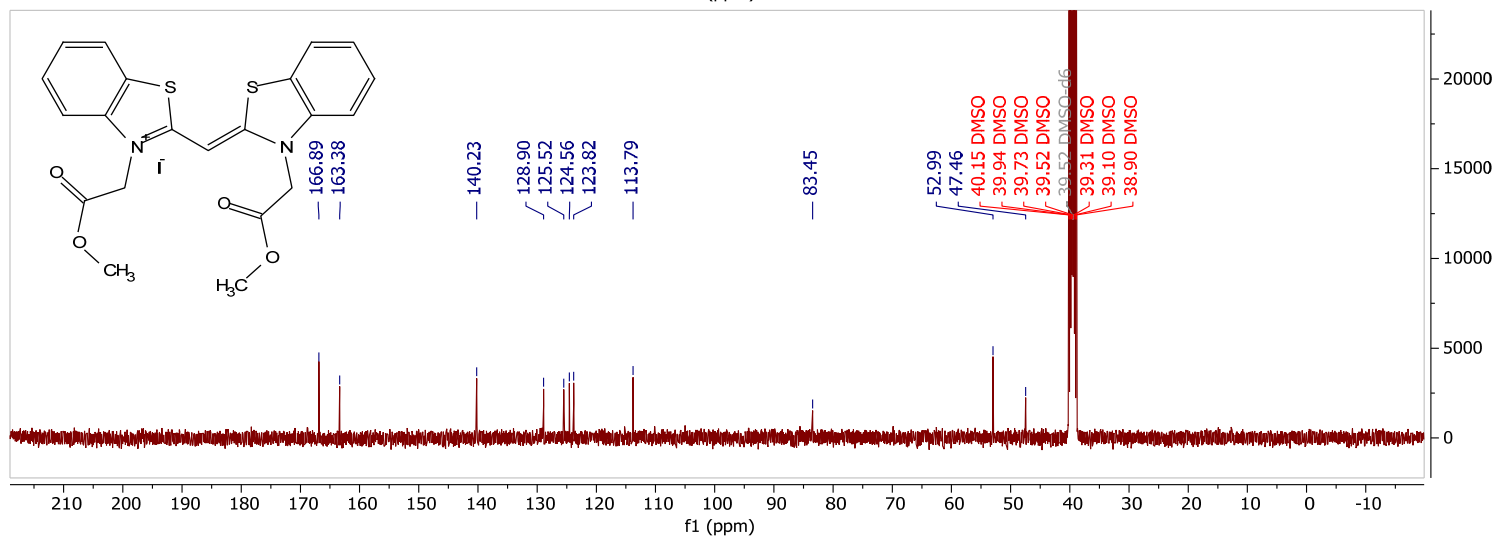

**Figure S11** – <sup>1</sup>H and <sup>13</sup>C NMR spectra of monomethine cyanine dye **9**.

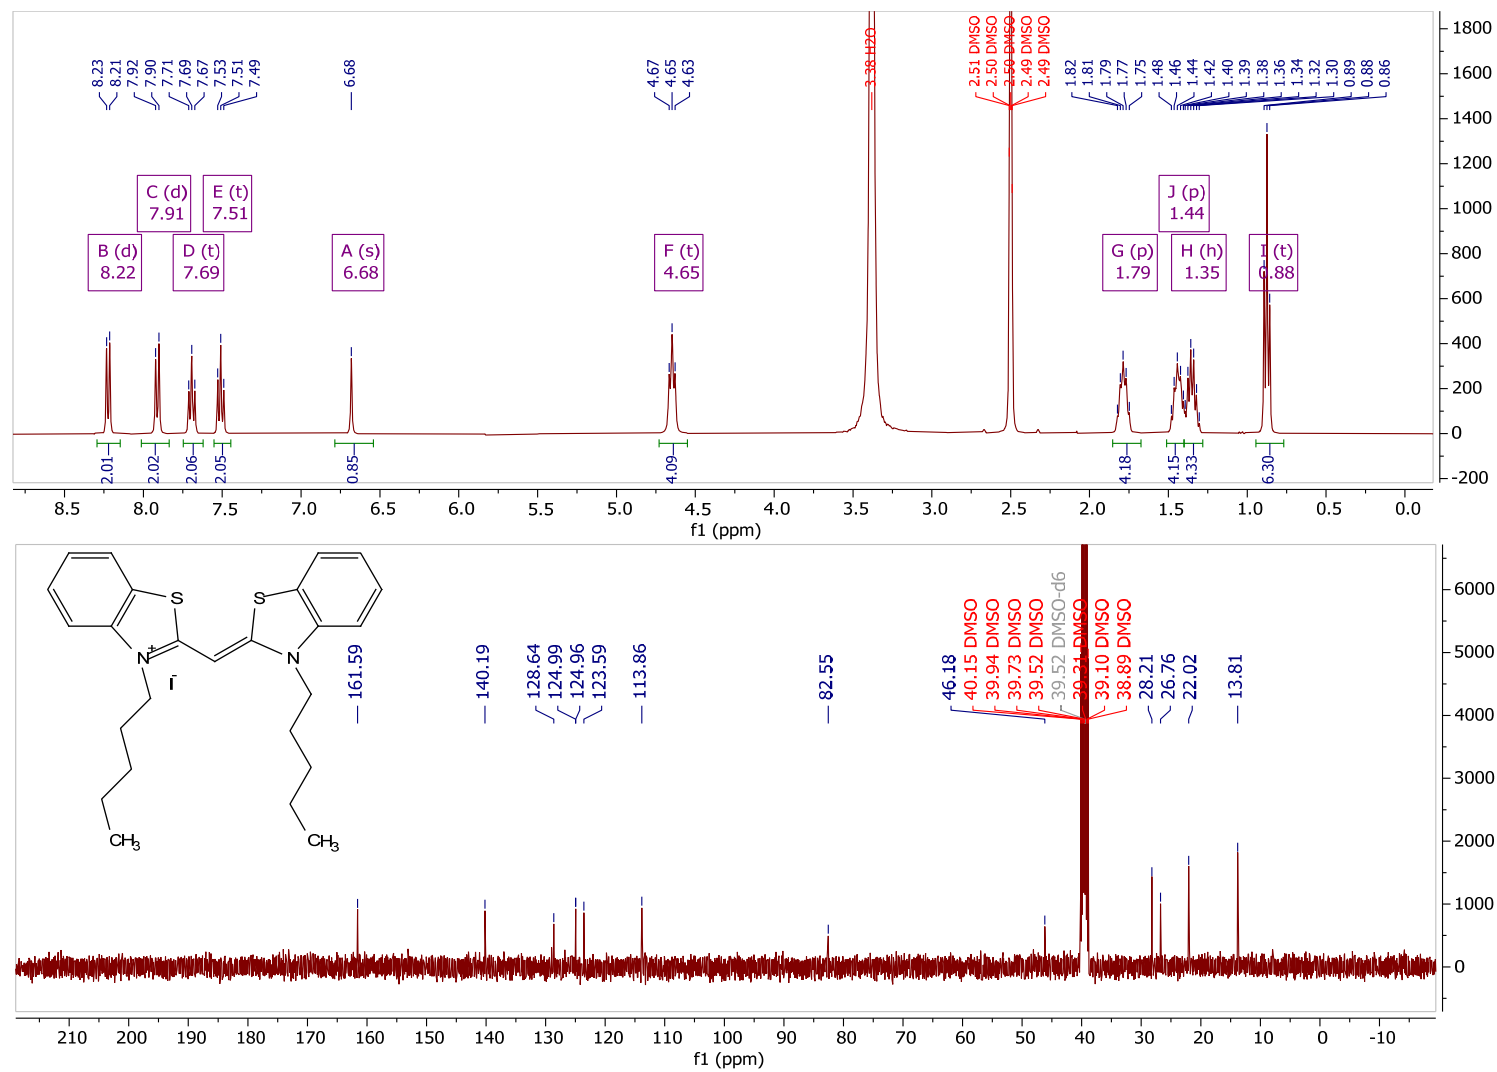

**Figure S12** – <sup>1</sup>H and <sup>13</sup>C NMR spectra of monomethine cyanine dye **10**.

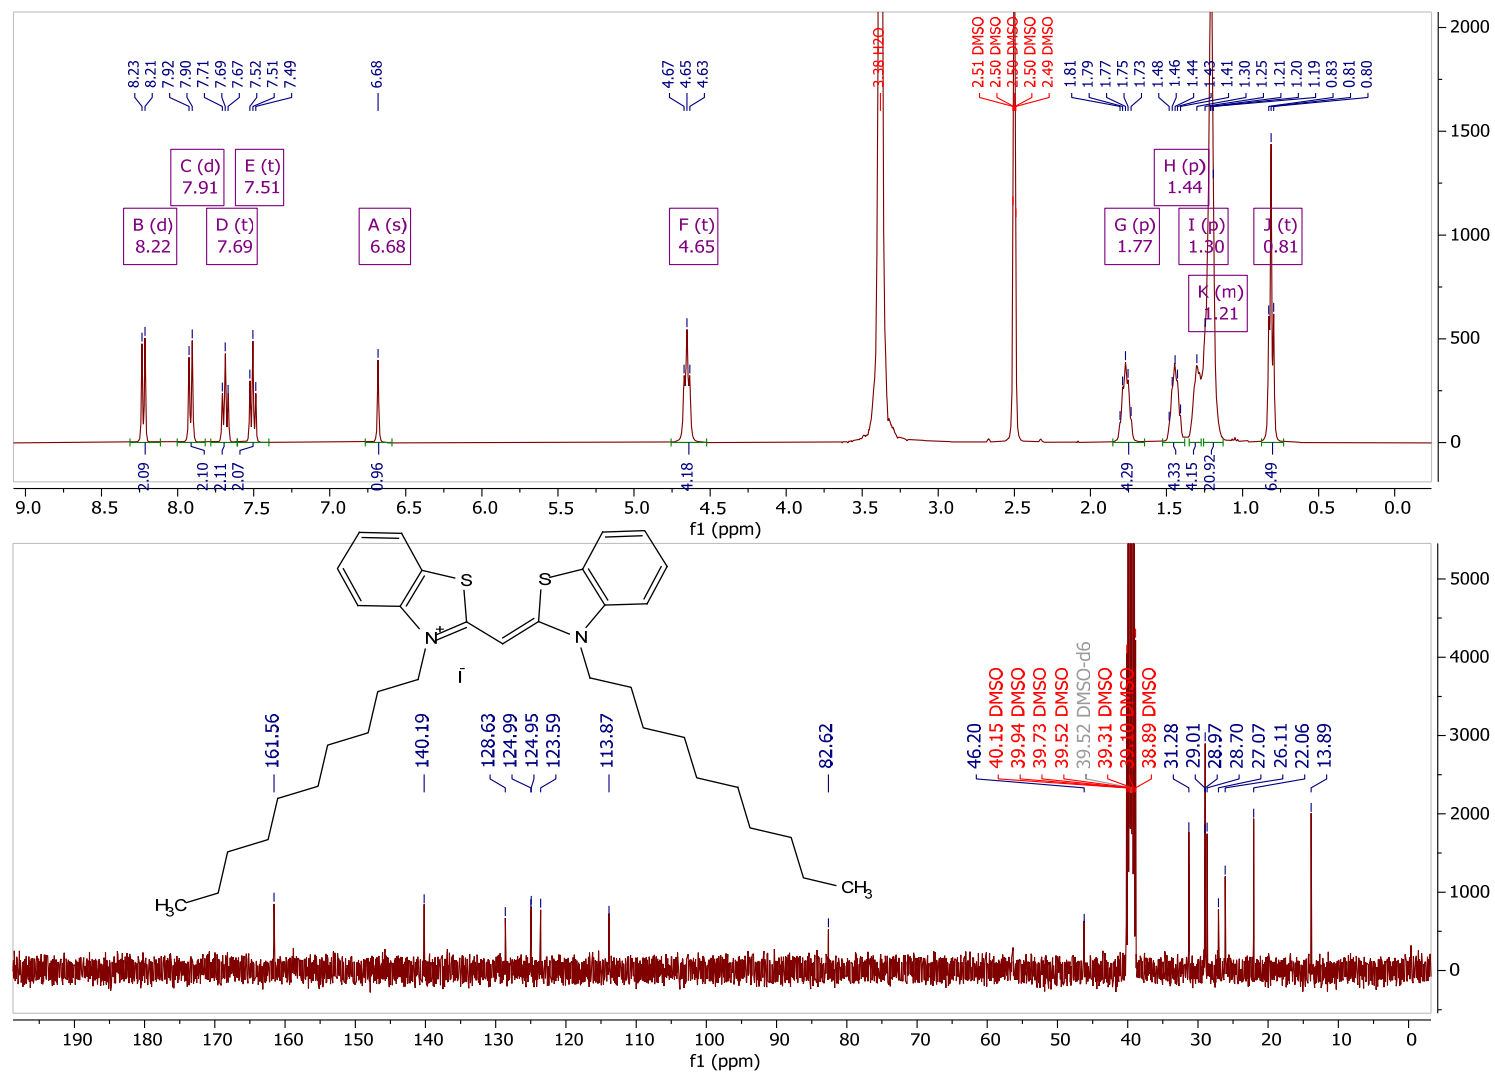

**Figure S13** – <sup>1</sup>H and <sup>13</sup>C NMR spectra of monomethine cyanine dye **11**.



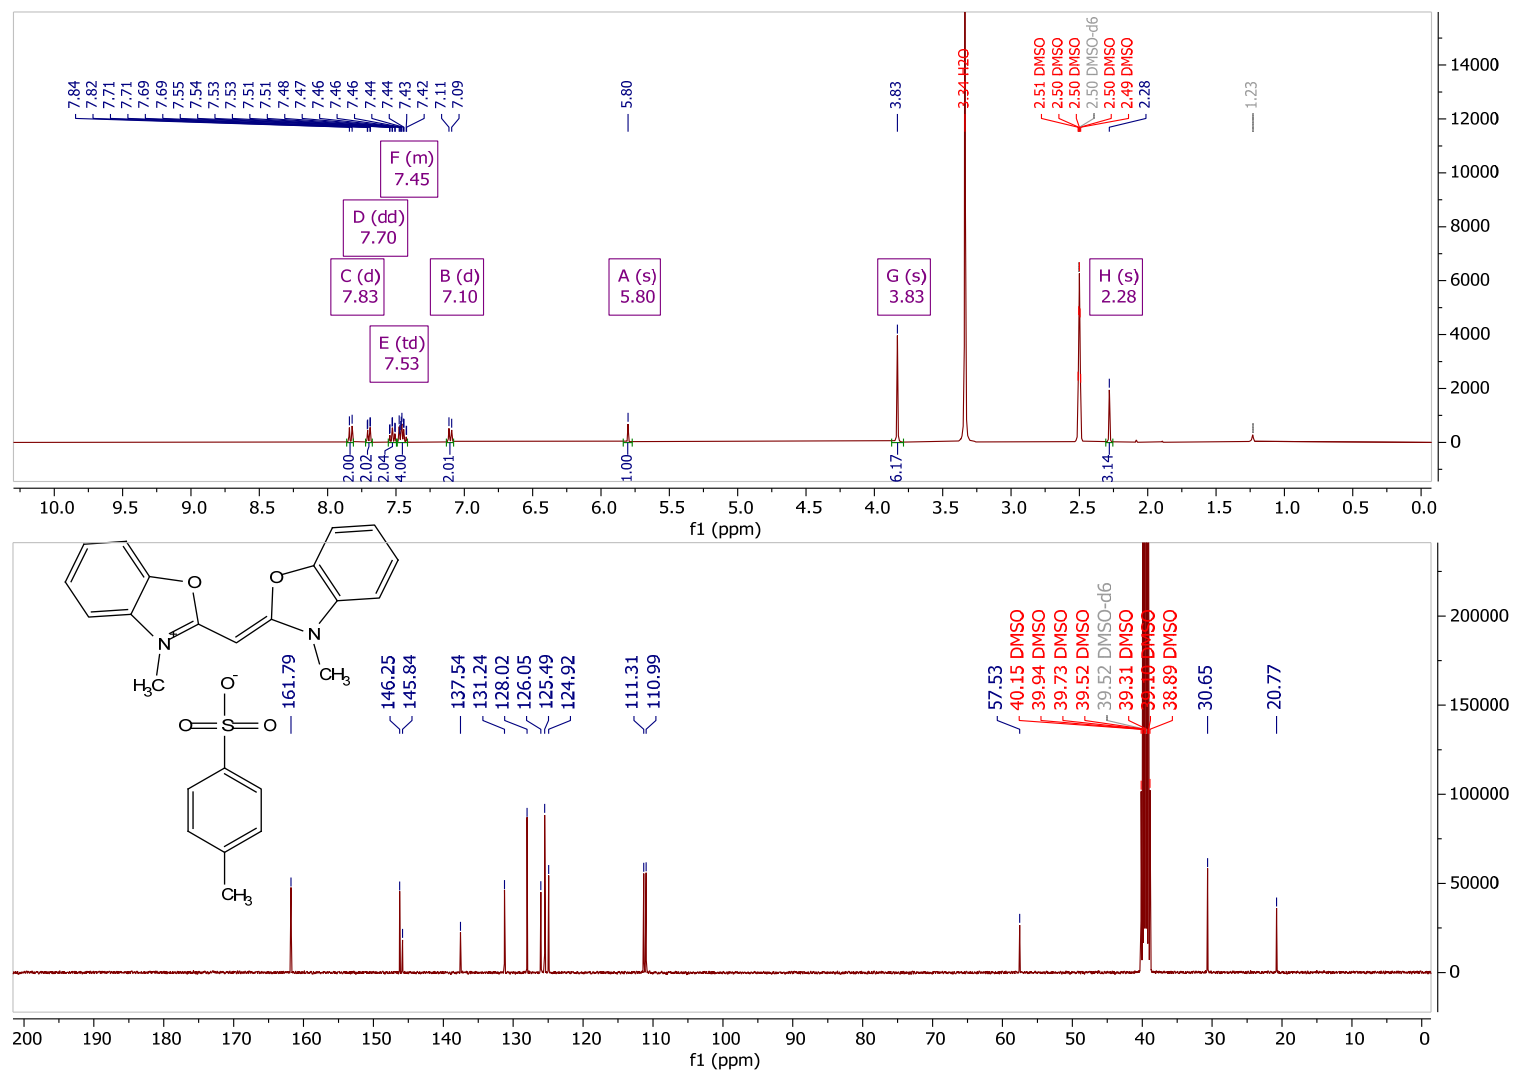

**Figure S14** – <sup>1</sup>H and <sup>13</sup>C NMR spectra of monomethine cyanine dye **12**.

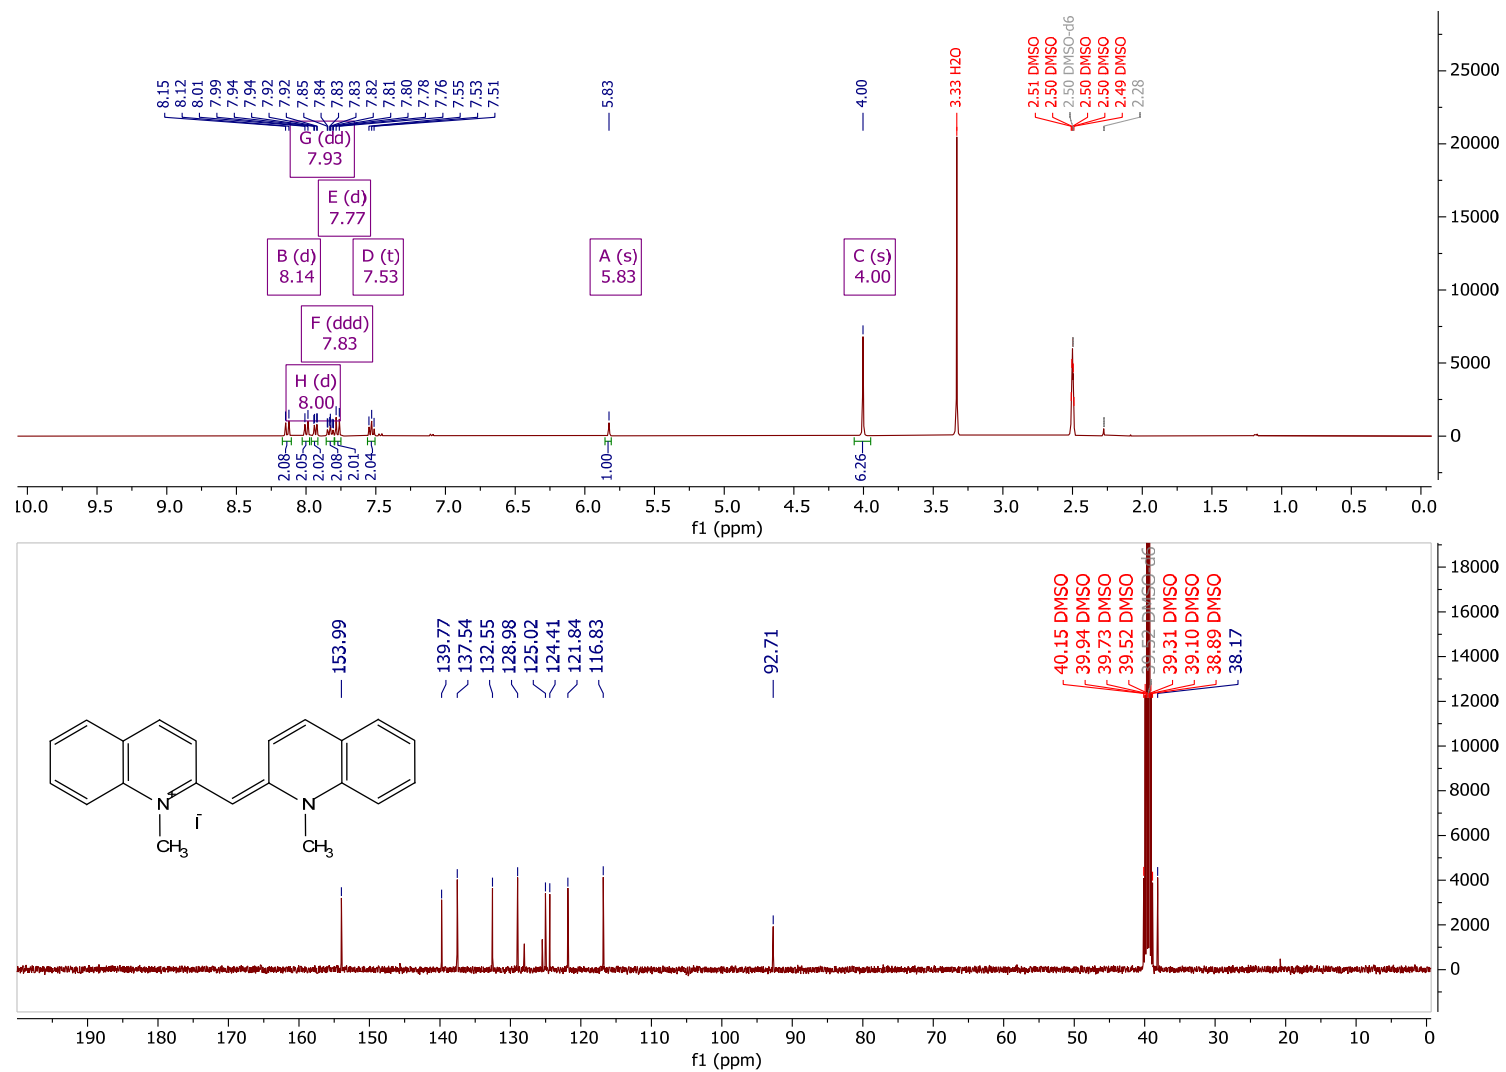

Figure S15 – <sup>1</sup>H and <sup>13</sup>C NMR spectra of monomethine cyanine dye **13**.

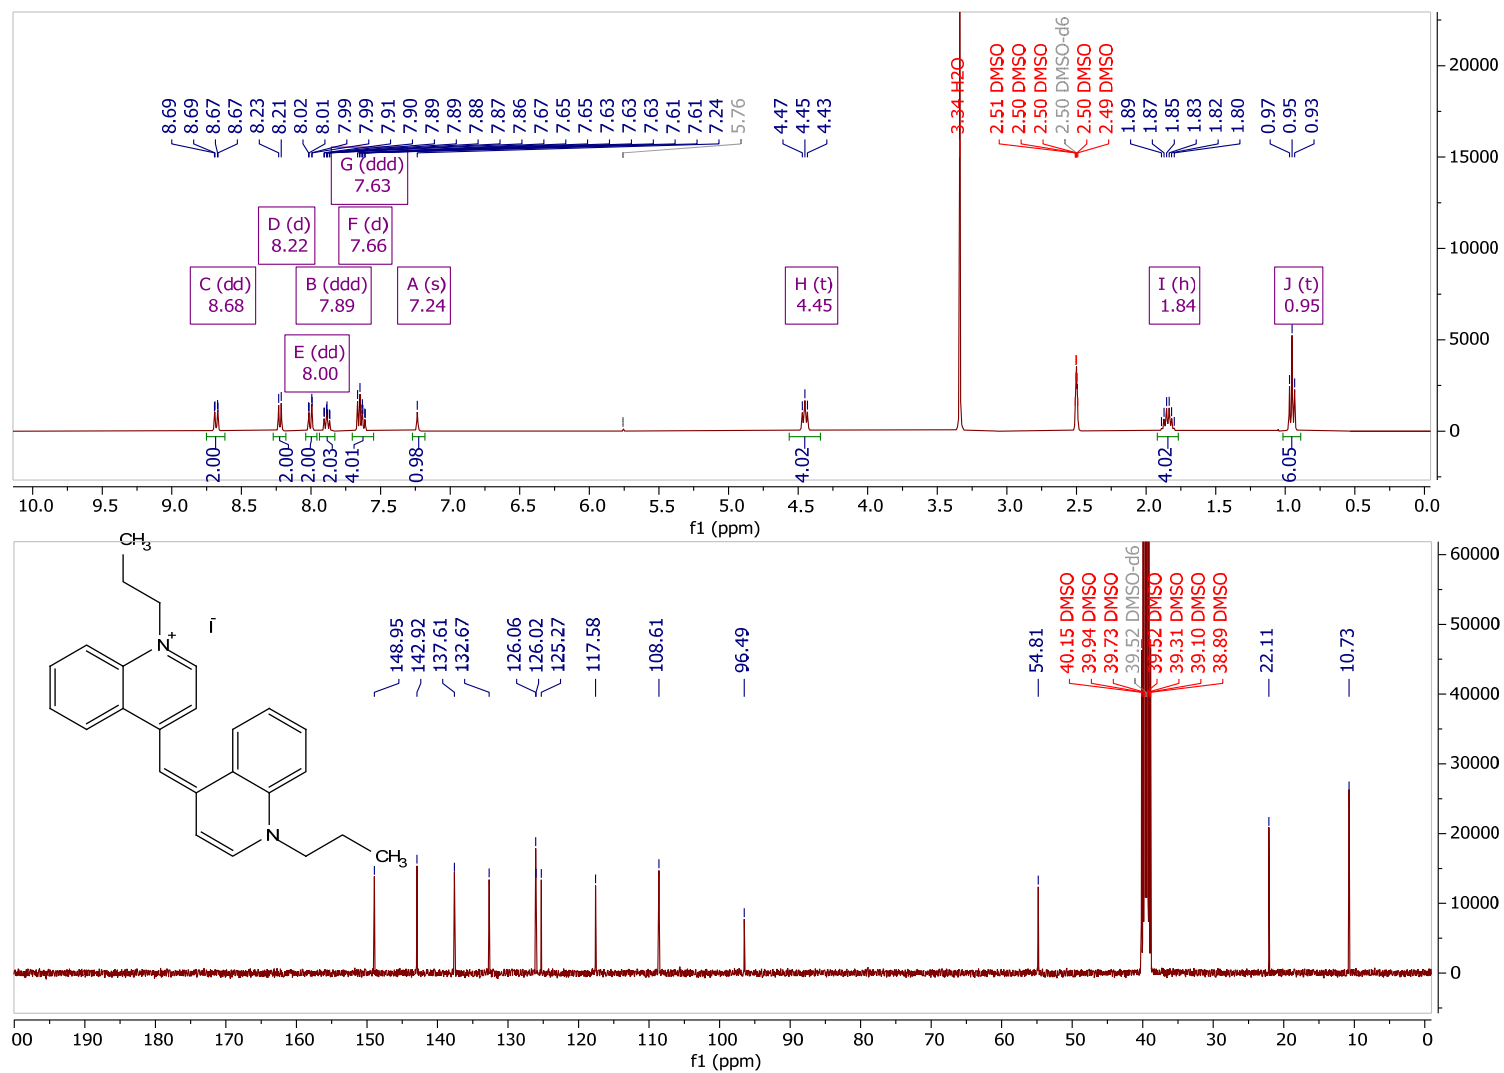

**Figure S16** – <sup>1</sup>H and <sup>13</sup>C NMR spectra of monomethine cyanine dye **14**.

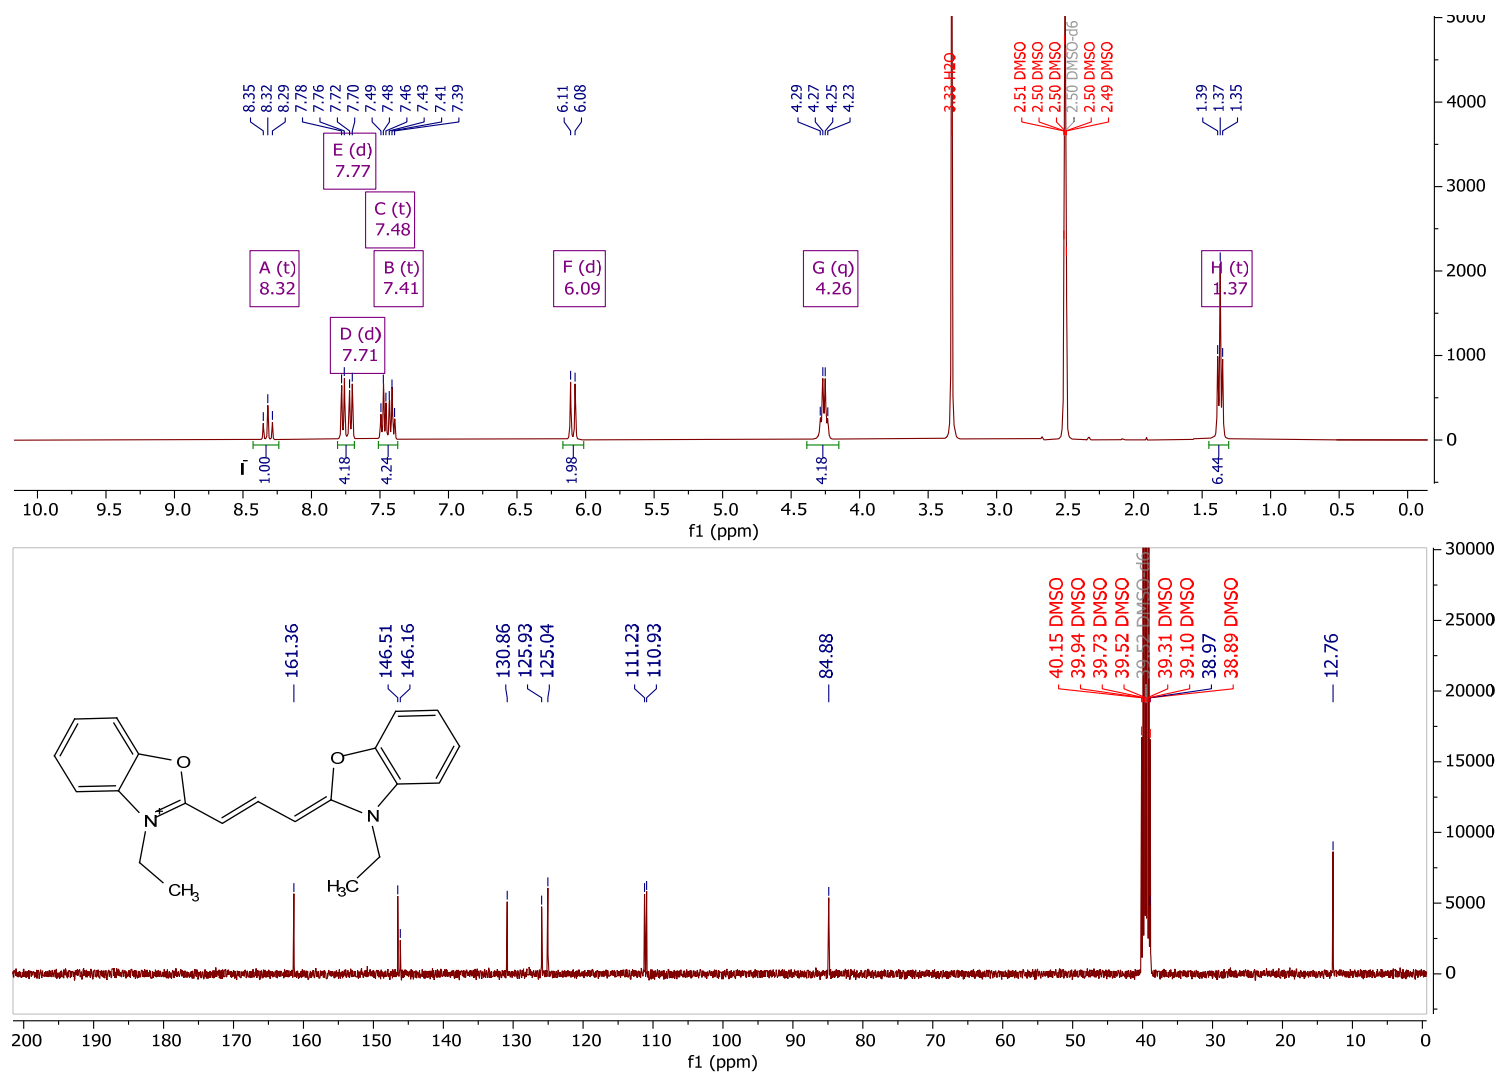

**Figure S17** – <sup>1</sup>H and <sup>13</sup>C NMR spectra of trimethine cyanine dye **15**.

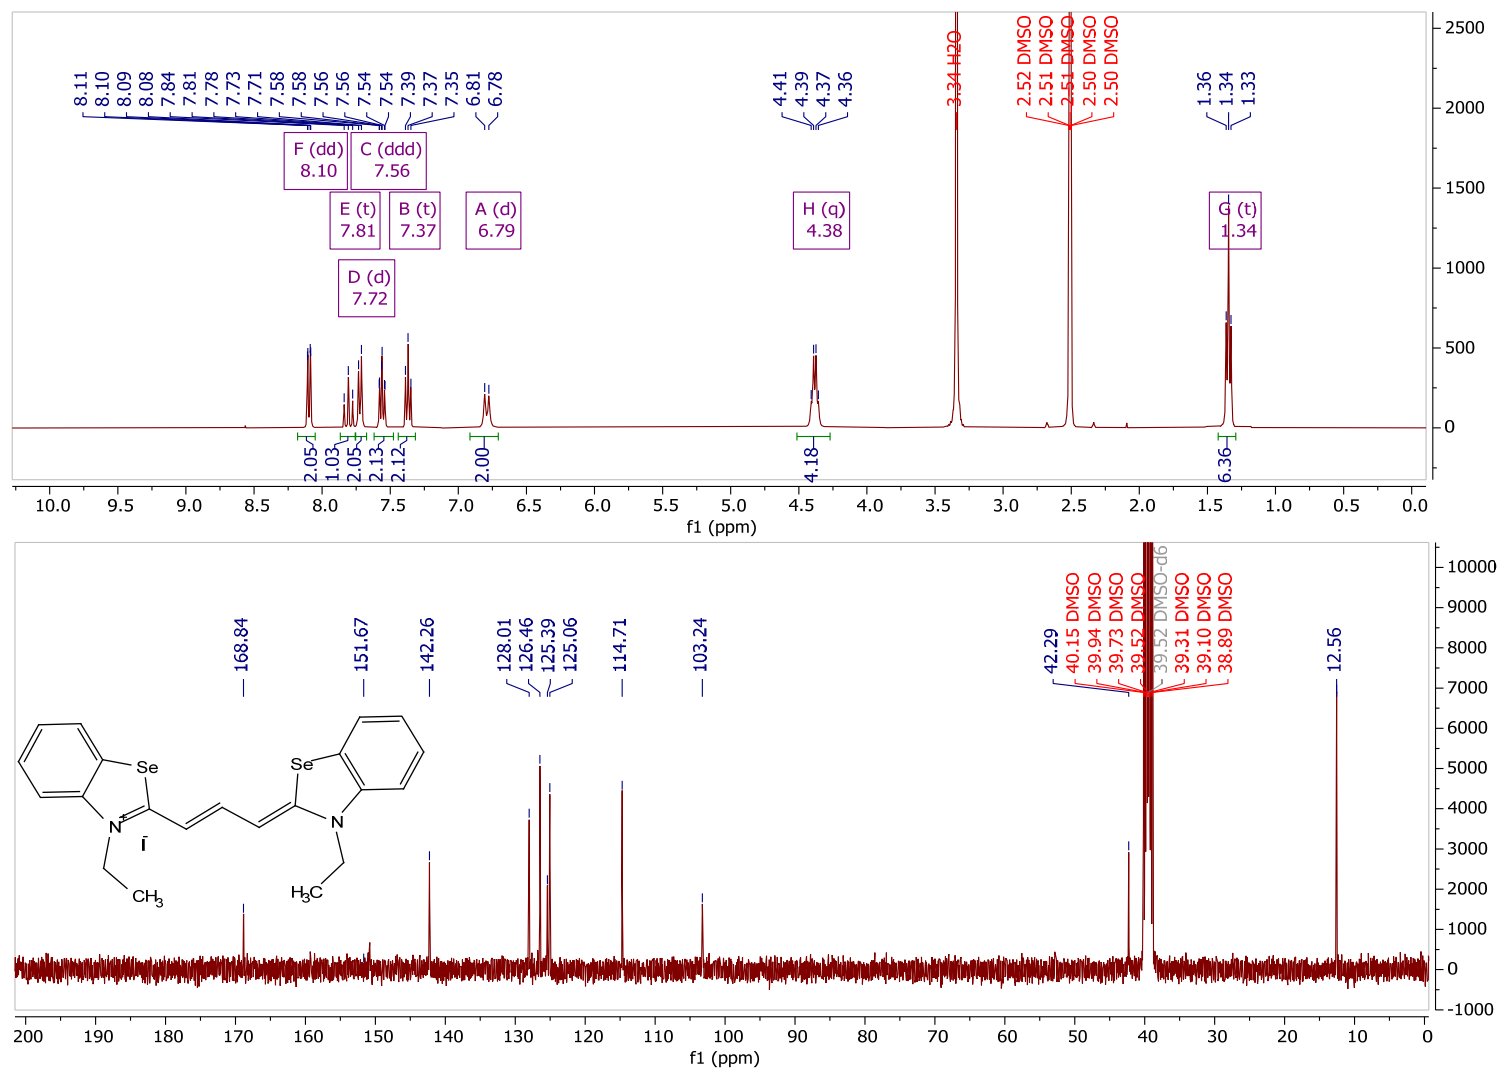

**Figure S18** –  $^1\text{H}$  and  $^{13}\text{C}$  NMR spectra of trimethine cyanine dye **16**.

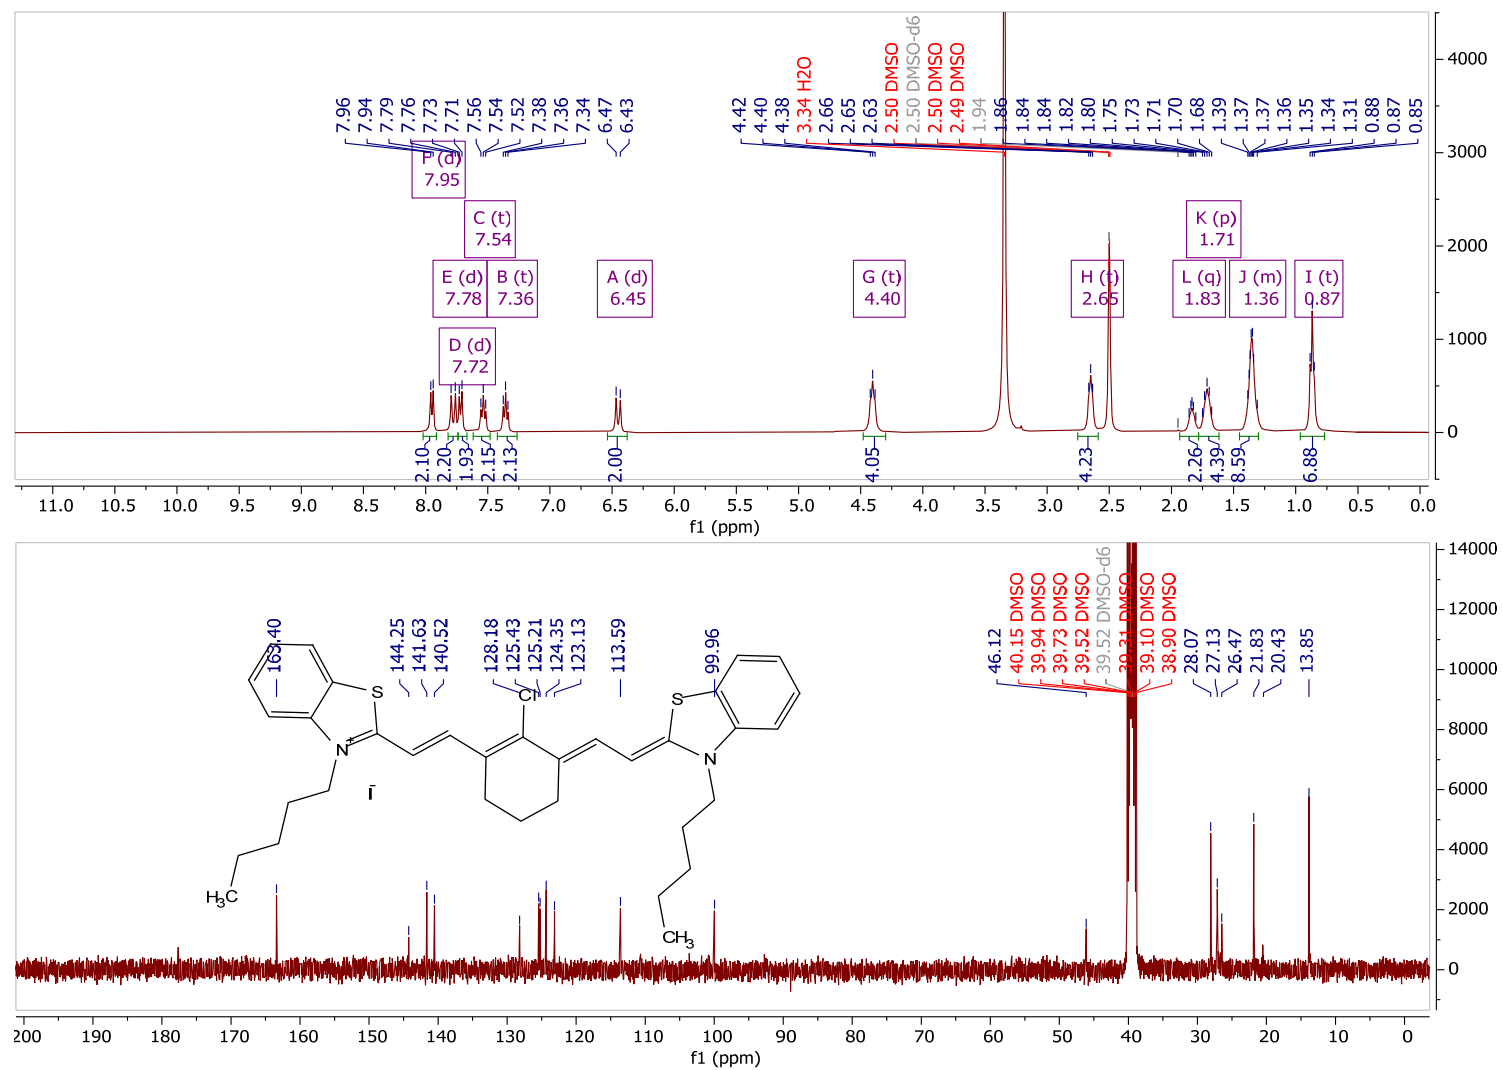

**Figure S19** – <sup>1</sup>H and <sup>13</sup>C NMR spectra of heptamethine cyanine dye **17**.

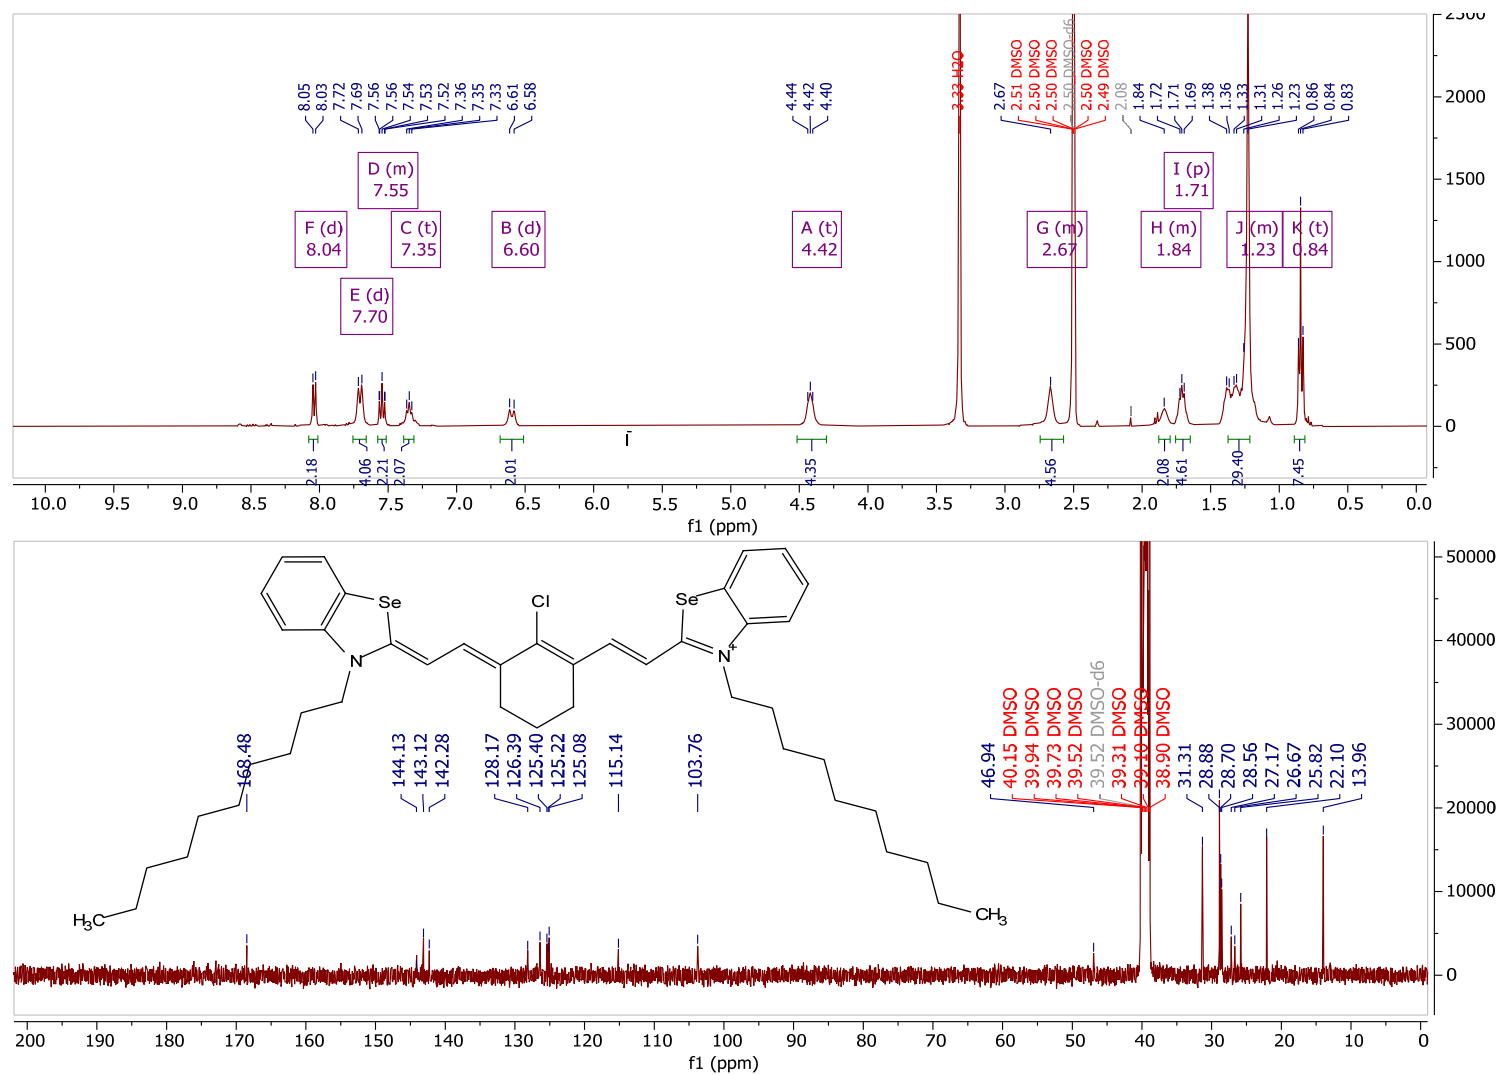

**Figure S20** – <sup>1</sup>H and <sup>13</sup>C NMR spectra of heptamethine cyanine dye **18**.

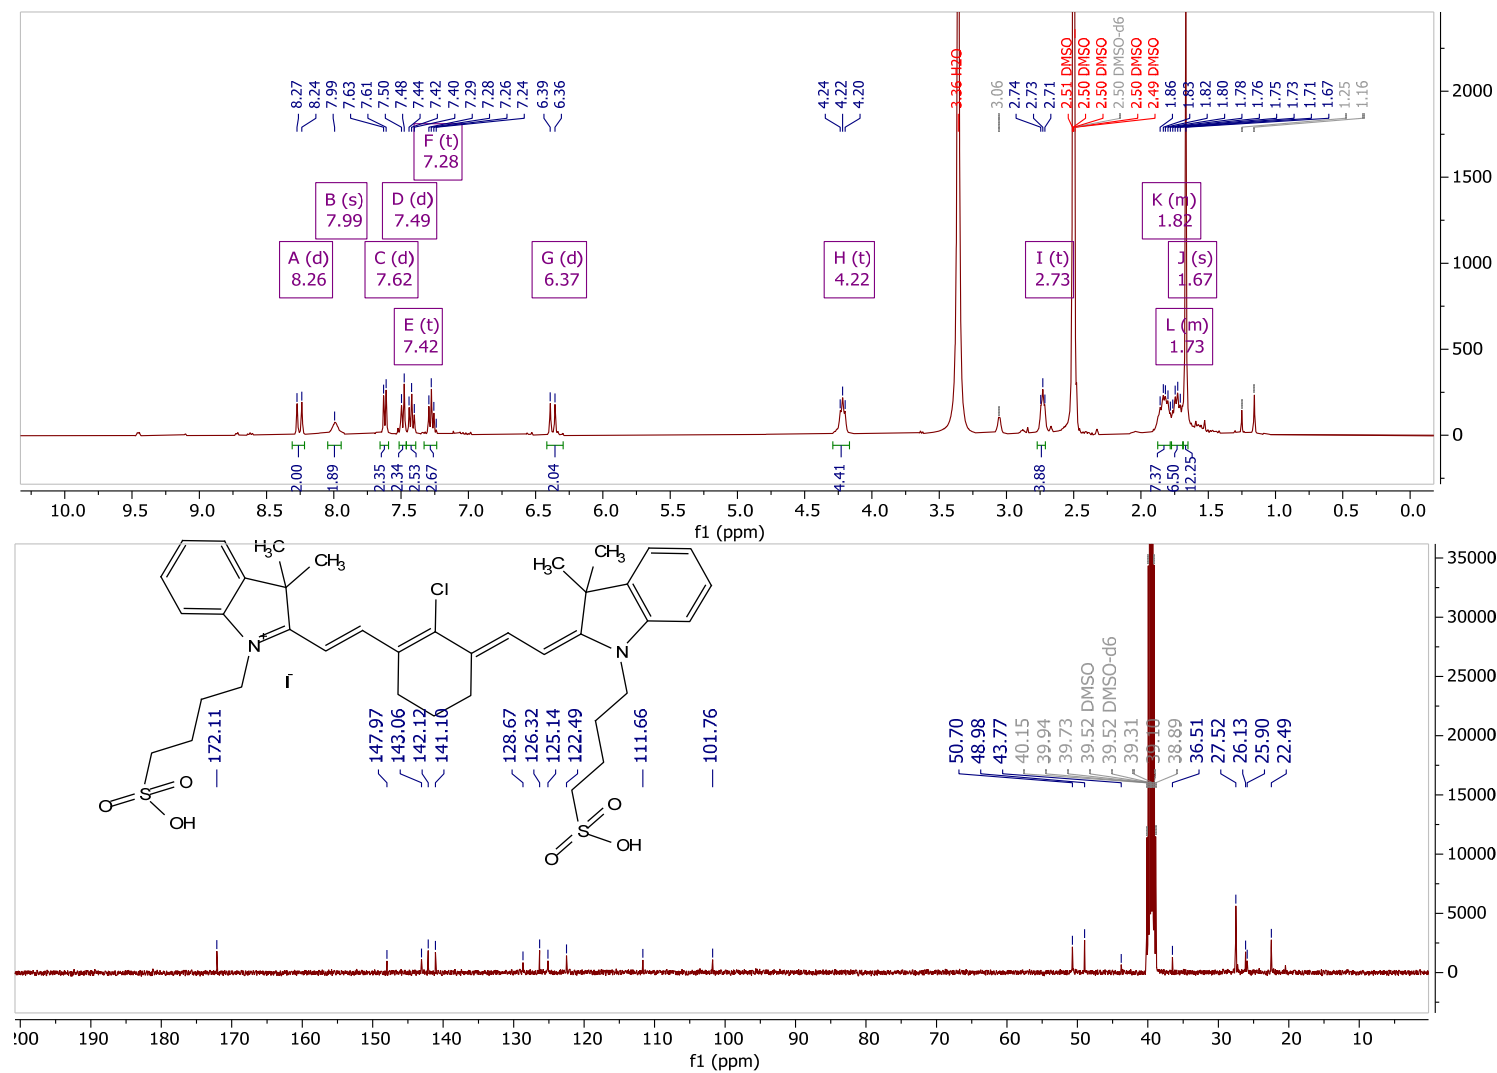

**Figure S21** – <sup>1</sup>H and <sup>13</sup>C NMR spectra of heptamethine cyanine dye **19**.



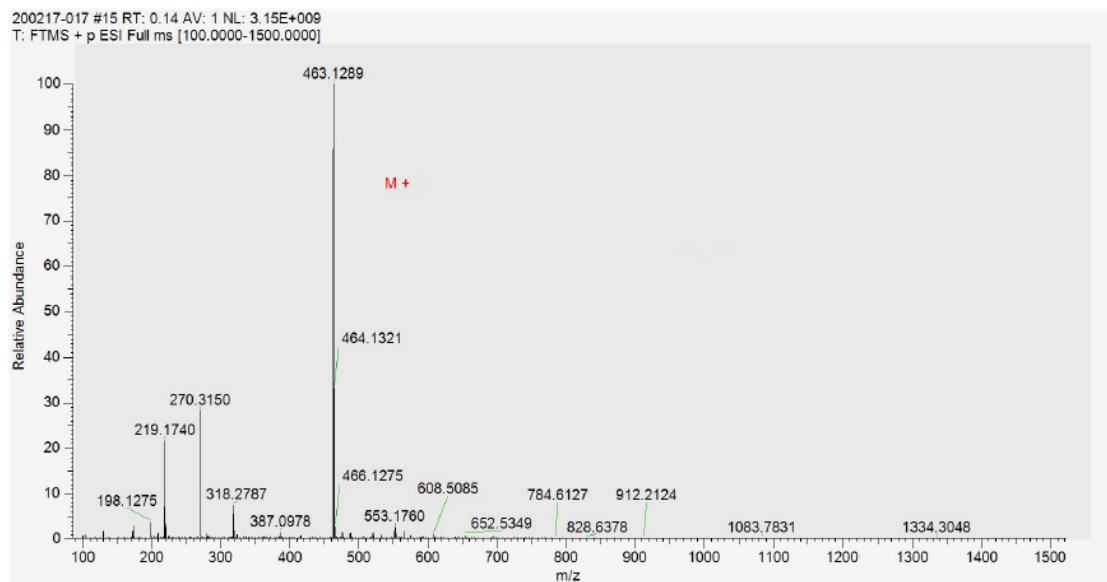


Fdo.: César Raposo Funcia  
**Director Técnico**

*Los resultados del análisis se refieren exclusivamente a la muestra sometida a ensayo*

**Figure S22** – ESI-HRMS spectrum of monomethine cyanine dye **8**.

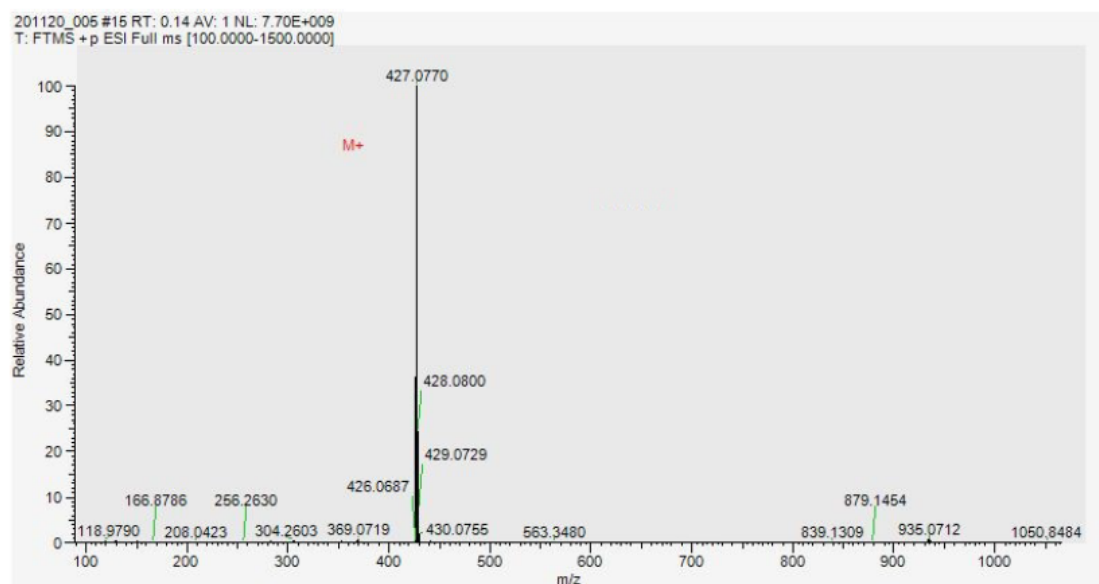


Fdo.: César Raposo Funcia  
**Director Técnico**

*Los resultados del análisis se refieren exclusivamente a la muestra sometida a ensayo*

**Figure S23** – ESI-HRMS spectrum of monomethine cyanine dye **9**.

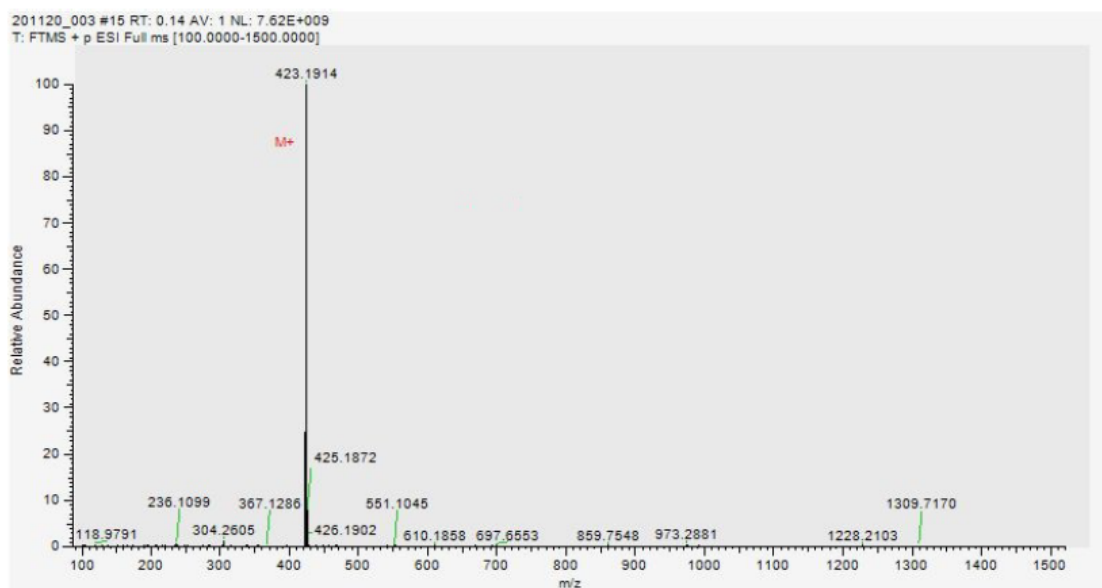

Fdo.: César Raposo Funcia  
**Director Técnico**

*Los resultados del análisis se refieren exclusivamente a la muestra sometida a ensayo*

**Figure S24** – ESI-HRMS spectrum of monomethine cyanine dye **10**.

201120\_004 #15 RT: 0.14 AV: 1 NL: 8.47E+009  
T: FTMS +p ESI Full ms [100.0000-1500.0000]

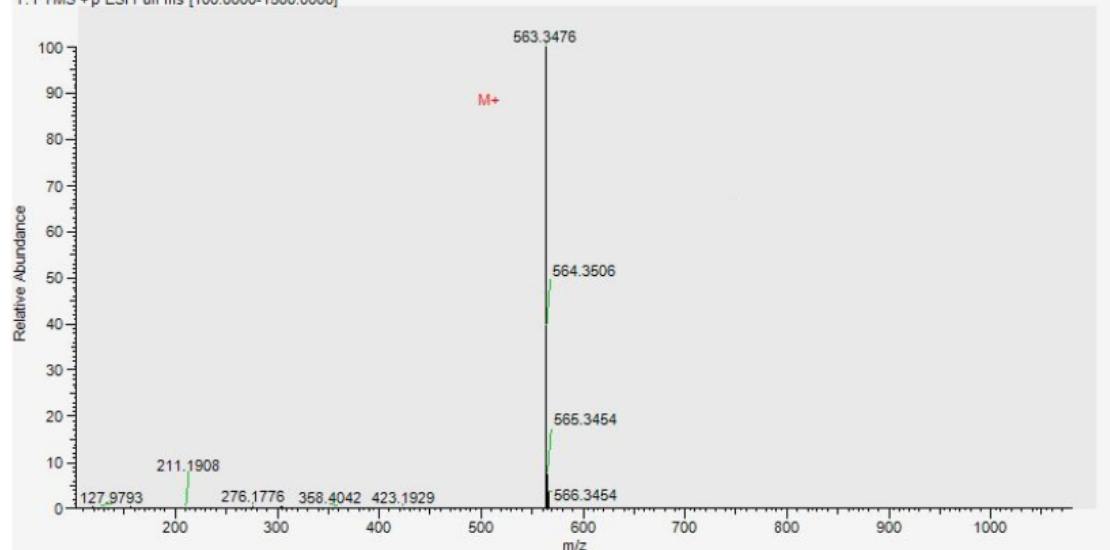

Fdo.: César Raposo Funcia  
**Director Técnico**

*Los resultados del análisis se refieren exclusivamente a la muestra sometida a ensayo*

**Figure S25** – ESI-HRMS spectrum of monomethine cyanine dye **11**.

200217-016 #15 RT: 0.14 AV: 1 NL: 1.29E+009  
T: FTMS + p ESI Full ms [100.0000-1500.0000]

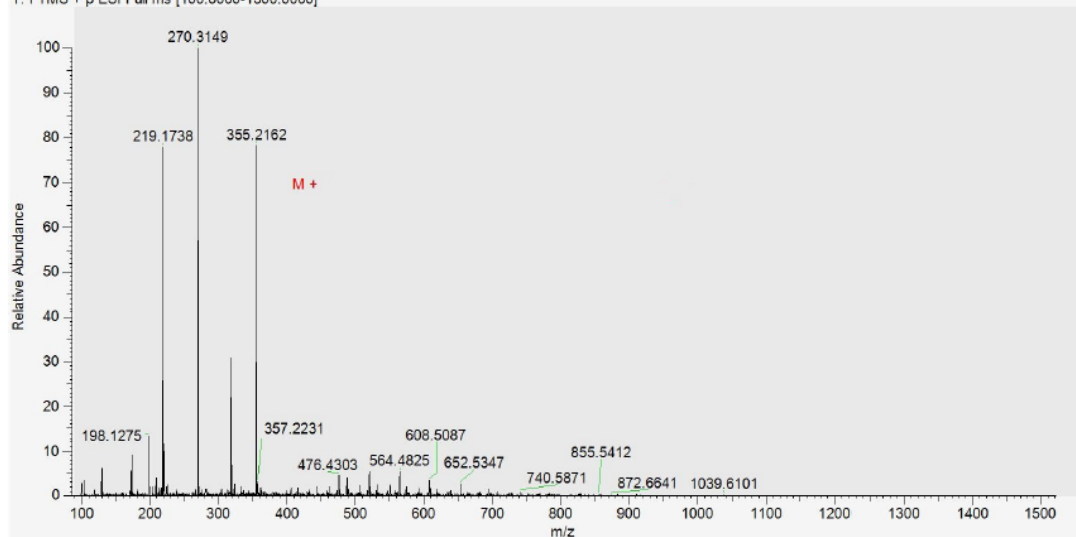

Fdo.: César Raposo Funcia  
**Director Técnico**

*Los resultados del análisis se refieren exclusivamente a la muestra sometida a ensayo*

**Figure S26** – ESI-HRMS spectrum of monomethine cyanine dye **14**.
